# Supplementary material
Source: MDPI journal article supplement (https://www.mdpi.com/2073-4433/12/10/1279)
Supplement: s1 [file s1]

## Supplementary Material S3

**Table S3.1** Seasonal average and standard deviation for the AWSs under the region R1 (2013–2018).

|               | Spring |     |      |     |      |     | Summer |     |      |     |      |     | Fall |     |      |     |      |     | Winter |     |      |     |     |     |
|---------------|--------|-----|------|-----|------|-----|--------|-----|------|-----|------|-----|------|-----|------|-----|------|-----|--------|-----|------|-----|-----|-----|
|               | Tmax   |     | Tmin |     | DTR  |     | Tmax   |     | Tmin |     | DTR  |     | Tmax |     | Tmin |     | DTR  |     | Tmax   |     | Tmin |     | DTR |     |
| AWS           | av     | SD  | av   | SD  | av   | SD  | av     | SD  | av   | SD  | av   | SD  | av   | SD  | av   | SD  | av   | SD  | av     | SD  | av   | SD  | av  | SD  |
| 135m_NSN_Pr   | 18.4   | 6.7 | 8.5  | 4.6 | 9.9  | 4.1 | 28.2   | 4.4 | 16.2 | 3.0 | 12.0 | 3.4 | 17.8 | 6.9 | 8.5  | 5.2 | 9.3  | 3.9 | 6.4    | 5.5 | 0.3  | 4.7 | 6.0 | 3.2 |
| 2013          | 19.2   | 6.9 | 10.7 | 3.6 | 8.6  | 5.2 | 27.9   | 5.2 | 15.4 | 3.0 | 12.5 | 3.6 | 17.5 | 6.3 | 8.4  | 4.5 | 9.1  | 4.0 | 5.8    | 4.8 | 0.8  | 4.2 | 5.0 | 3.3 |
| 2014          | 18.2   | 5.2 | 8.3  | 3.6 | 10.0 | 3.6 | 26.8   | 3.7 | 15.4 | 2.7 | 11.4 | 3.4 | 17.7 | 6.3 | 9.5  | 5.4 | 8.2  | 3.4 | 8.6    | 5.8 | 2.1  | 5.0 | 6.5 | 3.4 |
| 2015          | 17.7   | 6.6 | 7.6  | 4.9 | 10.1 | 3.9 | 29.2   | 5.0 | 16.6 | 3.0 | 12.6 | 3.7 | 17.5 | 7.3 | 8.4  | 5.9 | 9.1  | 4.2 | 6.0    | 4.2 | 0.5  | 3.8 | 5.5 | 3.3 |
| 2016          | 17.8   | 6.5 | 7.9  | 4.5 | 9.9  | 4.3 | 27.4   | 3.9 | 16.0 | 2.7 | 11.4 | 3.2 | 17.0 | 7.4 | 7.5  | 5.5 | 9.4  | 3.9 | 6.8    | 6.3 | −0.1 | 5.2 | 6.9 | 3.0 |
| 2017          | 18.7   | 5.9 | 8.0  | 4.3 | 10.7 | 3.5 | 30.2   | 4.8 | 16.8 | 3.6 | 13.4 | 3.4 | 17.4 | 6.3 | 8.3  | 4.2 | 9.1  | 3.9 | 4.6    | 7.2 | −1.9 | 6.3 | 6.5 | 3.3 |
| 2018          | 19.0   | 9.3 | 8.6  | 6.6 | 10.4 | 4.2 | 27.8   | 3.8 | 16.9 | 2.7 | 10.9 | 3.2 | 19.7 | 7.7 | 8.8  | 5.6 | 10.8 | 4.2 | 6.4    | 4.9 | 0.6  | 3.9 | 5.9 | 3.2 |
| 151m_NSC_G_Pe | 18.1   | 6.8 | 8.9  | 4.8 | 9.1  | 3.6 | 28.6   | 4.5 | 17.0 | 3.2 | 11.6 | 3.2 | 20.1 | 6.6 | 10.5 | 4.4 | 9.6  | 3.9 | 5.4    | 5.1 | 0.1  | 4.2 | 5.3 | 2.5 |
| 2016          | 17.8   | 6.7 | 9.2  | 4.8 | 8.7  | 3.9 | 27.5   | 3.9 | 16.5 | 2.6 | 11.0 | 3.1 | 17.3 | 7.5 | 8.0  | 5.4 | 9.4  | 3.8 | 6.8    | 6.4 | 0.7  | 5.3 | 6.0 | 3.0 |
| 2017          | 16.1   | 5.5 | 6.7  | 3.8 | 9.4  | 3.2 | 31.3   | 5.3 | 17.9 | 3.8 | 13.4 | 3.3 | 21.9 | 5.4 | 13.1 | 2.6 | 8.8  | 4.2 | 3.5    | 7.7 | −2.9 | 6.7 | 6.4 | 3.3 |
| 2018          | 20.2   | 8.2 | 10.8 | 5.7 | 9.4  | 3.7 | 27.2   | 4.4 | 16.6 | 3.0 | 10.6 | 3.3 | 21.1 | 6.8 | 10.5 | 5.2 | 10.6 | 3.8 | 6.0    | 1.2 | 2.4  | 0.8 | 3.6 | 1.1 |
| 78m_VRB_Pl    | 18.4   | 5.9 | 7.4  | 4.4 | 11.0 | 4.9 | 26.1   | 5.5 | 15.8 | 3.4 | 10.3 | 4.7 | 16.2 | 6.5 | 7.9  | 5.0 | 8.3  | 4.7 | 6.4    | 5.0 | −0.3 | 4.2 | 6.7 | 3.7 |
| 2013          | 23.0   | 4.6 | 10.5 | 3.4 | 12.5 | 4.1 | 28.8   | 5.3 | 15.5 | 3.0 | 13.3 | 3.6 | 18.0 | 6.5 | 7.6  | 3.9 | 10.5 | 4.7 | 5.1    | 4.1 | −2.1 | 2.8 | 7.2 | 3.6 |
| 2014          | 18.9   | 5.2 | 7.1  | 4.4 | 11.8 | 4.7 | 26.7   | 4.1 | 15.4 | 3.9 | 11.4 | 5.0 | 16.7 | 6.3 | 8.8  | 5.4 | 7.9  | 4.5 | 7.6    | 6.4 | −0.2 | 5.3 | 7.8 | 3.9 |
| 2015          | 18.0   | 6.8 | 6.3  | 5.3 | 11.8 | 4.9 | 22.9   | 7.0 | 16.7 | 3.4 | 6.2  | 5.3 | 14.0 | 6.8 | 7.5  | 5.8 | 6.5  | 5.1 | 5.5    | 3.9 | −0.1 | 4.0 | 5.6 | 3.7 |
| 2016          | 13.6   | 7.0 | 5.8  | 4.4 | 7.9  | 6.0 |        |     |      |     |      |     |      |     |      |     |      |     | 7.4    | 5.6 | 1.3  | 5.0 | 6.0 | 3.5 |
| 79m_NSC_A     | 18.7   | 7.2 | 7.0  | 5.0 | 11.6 | 4.6 | 29.7   | 4.8 | 15.1 | 2.7 | 14.6 | 4.4 | 19.4 | 6.9 | 7.4  | 4.9 | 12.0 | 5.1 | 6.0    | 5.3 | −0.5 | 4.4 | 6.5 | 3.7 |
| 2013          | 17.5   | 8.5 | 6.3  | 5.7 | 11.2 | 4.8 | 29.3   | 5.5 | 14.4 | 2.5 | 14.9 | 4.3 | 20.5 | 5.4 | 8.5  | 3.7 | 12.0 | 6.0 | 5.7    | 3.7 | 1.1  | 3.2 | 4.6 | 3.1 |
| 2014          | 18.7   | 5.1 | 7.6  | 3.9 | 11.2 | 4.4 | 27.7   | 3.8 | 14.6 | 2.9 | 13.0 | 3.9 | 18.4 | 6.7 | 8.3  | 5.3 | 10.0 | 4.4 | 7.6    | 5.6 | 1.0  | 5.4 | 6.6 | 3.9 |
| 2015          | 18.1   | 6.8 | 6.4  | 5.1 | 11.8 | 4.5 | 30.8   | 5.7 | 15.3 | 2.7 | 15.5 | 4.8 | 18.6 | 7.7 | 7.3  | 5.8 | 11.3 | 5.6 | 5.7    | 4.2 | −0.2 | 3.8 | 5.9 | 4.0 |
| 2016          | 18.4   | 6.5 | 7.3  | 4.3 | 11.1 | 4.5 | 28.5   | 4.3 | 15.2 | 2.6 | 13.3 | 4.3 | 17.5 | 7.8 | 6.0  | 5.4 | 11.5 | 4.7 | 6.3    | 6.0 | −1.2 | 4.6 | 7.5 | 3.6 |

|           |      |      |     |     |      |     |      |     |      |     |      |     |      |     |     |     |      |     |     |     |      |     |     |     |
|-----------|------|------|-----|-----|------|-----|------|-----|------|-----|------|-----|------|-----|-----|-----|------|-----|-----|-----|------|-----|-----|-----|
| 2017      | 19.2 | 6.1  | 6.7 | 4.5 | 12.5 | 4.2 | 31.3 | 5.1 | 15.0 | 3.1 | 16.3 | 4.6 | 18.3 | 7.0 | 6.5 | 4.1 | 11.8 | 5.4 | 4.5 | 7.0 | -3.3 | 6.1 | 7.9 | 4.1 |
| 2018      | 20.1 | 10.2 | 8.0 | 6.7 | 12.1 | 5.2 | 30.7 | 4.4 | 16.2 | 2.5 | 14.5 | 4.2 | 23.2 | 6.6 | 8.0 | 5.1 | 15.2 | 4.6 | 6.1 | 5.3 | -0.4 | 3.3 | 6.5 | 3.7 |
| 80m_NSK_A | 19.7 | 9.9  | 7.6 | 6.5 | 12.1 | 5.3 | 30.2 | 5.4 | 15.8 | 3.1 | 14.4 | 5.3 | 19.1 | 7.4 | 6.8 | 5.0 | 12.4 | 5.3 | 6.9 | 5.0 | -0.4 | 3.6 | 7.3 | 3.9 |
| 2017      |      |      |     |     |      |     | 32.3 | 5.4 | 15.1 | 3.3 | 17.2 | 5.0 | 18.0 | 7.0 | 6.6 | 4.3 | 11.4 | 5.4 | 7.6 | 5.1 | 0.0  | 3.3 | 7.6 | 3.9 |
| 2018      | 19.7 | 9.9  | 7.6 | 6.5 | 12.1 | 5.3 | 28.1 | 5.4 | 16.5 | 2.8 | 11.6 | 5.5 | 20.3 | 7.9 | 7.0 | 5.7 | 13.3 | 5.2 | 6.1 | 4.9 | -0.8 | 3.8 | 6.9 | 3.8 |
| Total     | 18.5 | 6.9  | 7.9 | 4.8 | 10.6 | 4.4 | 28.6 | 4.8 | 15.9 | 3.0 | 12.7 | 4.0 | 18.5 | 6.8 | 8.2 | 4.9 | 10.3 | 4.5 | 6.2 | 5.2 | -0.1 | 4.4 | 6.3 | 3.4 |

**Table S3.2** Seasonal average and standard deviation for the AWSs under the region R2 (2013–2018).

|             | Spring |      |      |     |      |     | Summer |     |      |     |      |     | Fall |     |      |     |      |     | Winter |     |      |     |     |     |
|-------------|--------|------|------|-----|------|-----|--------|-----|------|-----|------|-----|------|-----|------|-----|------|-----|--------|-----|------|-----|-----|-----|
|             | Tmax   |      | Tmin |     | DTR  |     | Tmax   |     | Tmin |     | DTR  |     | Tmax |     | Tmin |     | DTR  |     | Tmax   |     | Tmin |     | DTR |     |
| AWS         | av     | SD   | av   | SD  | av   | SD  | av     | SD  | av   | SD  | av   | SD  | av   | SD  | av   | SD  | av   | SD  | av     | SD  | av   | SD  | av  | SD  |
| 119m_SLj_A  | 18.3   | 6.6  | 5.7  | 4.9 | 12.6 | 4.8 | 28.1   | 4.0 | 14.5 | 2.8 | 13.5 | 3.9 | 16.9 | 7.2 | 6.3  | 5.2 | 10.6 | 5.1 | 5.1    | 5.0 | -1.9 | 4.8 | 7.0 | 3.8 |
| 2014        | 19.2   | 4.7  | 6.4  | 4.0 | 12.8 | 4.7 | 26.7   | 3.6 | 13.5 | 3.2 | 13.2 | 4.0 | 18.0 | 7.1 | 7.8  | 5.3 | 10.2 | 5.2 | 6.1    | 5.0 | -0.7 | 5.4 | 6.9 | 3.7 |
| 2015        | 17.4   | 6.2  | 5.0  | 5.0 | 12.4 | 4.7 | 29.1   | 5.2 | 14.9 | 2.7 | 14.1 | 4.7 | 17.4 | 7.4 | 6.3  | 5.6 | 11.1 | 5.5 | 5.1    | 3.8 | -0.9 | 4.2 | 6.0 | 3.9 |
| 2016        | 17.8   | 6.3  | 5.7  | 4.3 | 12.1 | 4.8 | 27.0   | 3.5 | 14.3 | 2.6 | 12.8 | 3.6 | 16.1 | 7.5 | 5.3  | 5.6 | 10.7 | 4.6 | 5.3    | 5.4 | -2.2 | 4.8 | 7.5 | 3.7 |
| 2017        | 18.5   | 6.0  | 5.3  | 4.3 | 13.2 | 4.7 | 29.7   | 4.3 | 14.1 | 3.2 | 15.6 | 4.0 | 16.3 | 6.6 | 5.8  | 4.4 | 10.5 | 5.1 | 3.9    | 6.2 | -4.1 | 5.9 | 8.0 | 4.1 |
| 2018        | 18.8   | 9.7  | 6.3  | 6.9 | 12.5 | 5.1 | 27.7   | 3.5 | 15.9 | 2.4 | 11.8 | 3.2 |      |     |      |     |      |     | 5.1    | 4.7 | -1.4 | 3.9 | 6.5 | 3.6 |
| 74m_SEK_G_A | 18.0   | 7.0  | 6.4  | 5.5 | 11.5 | 4.6 | 29.5   | 4.5 | 14.9 | 3.3 | 14.6 | 4.2 | 17.8 | 7.2 | 6.9  | 5.1 | 10.9 | 4.8 | 5.4    | 4.9 | -1.4 | 4.4 | 6.8 | 3.6 |
| 2013        | 15.3   | 8.5  | 7.3  | 7.4 | 8.0  | 4.7 | 29.7   | 5.2 | 14.2 | 3.1 | 15.5 | 4.4 | 17.9 | 6.3 | 6.8  | 4.2 | 11.1 | 5.0 | 5.3    | 4.3 | -1.2 | 3.7 | 6.5 | 4.1 |
| 2014        | 18.9   | 5.1  | 6.8  | 4.0 | 12.1 | 4.6 | 27.9   | 4.0 | 13.8 | 3.4 | 14.2 | 4.3 | 17.6 | 6.6 | 8.5  | 5.4 | 9.1  | 4.1 | 7.4    | 5.1 | 0.3  | 4.6 | 7.1 | 3.5 |
| 2015        | 18.0   | 6.4  | 5.3  | 5.1 | 12.7 | 4.6 | 30.5   | 5.4 | 15.5 | 3.3 | 15.1 | 4.5 | 17.4 | 7.5 | 6.9  | 6.0 | 10.5 | 5.2 | 5.4    | 3.7 | -0.4 | 4.0 | 5.8 | 3.6 |
| 2016        | 18.2   | 6.3  | 6.3  | 4.5 | 11.9 | 4.6 | 28.3   | 3.9 | 14.9 | 3.3 | 13.4 | 3.8 | 16.8 | 8.0 | 5.7  | 5.4 | 11.1 | 4.8 | 5.3    | 5.5 | -1.8 | 4.5 | 7.1 | 3.5 |
| 2017        | 18.5   | 6.2  | 5.9  | 4.7 | 12.7 | 4.5 | 31.1   | 4.8 | 15.1 | 3.7 | 16.0 | 4.4 | 17.3 | 6.8 | 6.2  | 4.5 | 11.1 | 4.9 | 4.2    | 6.1 | -3.6 | 5.5 | 7.8 | 3.8 |
| 2018        | 19.1   | 9.7  | 7.2  | 7.1 | 11.8 | 4.8 | 29.3   | 3.7 | 15.9 | 3.0 | 13.4 | 3.8 | 19.7 | 7.7 | 7.0  | 5.4 | 12.7 | 4.8 | 5.1    | 4.4 | -1.5 | 4.1 | 6.6 | 2.9 |
| 91m_SBV_Pe  | 18.2   | 8.0  | 6.3  | 5.1 | 11.9 | 5.4 | 29.8   | 4.9 | 14.9 | 4.0 | 14.9 | 5.2 | 17.2 | 7.7 | 6.1  | 5.1 | 11.2 | 6.1 | 4.6    | 5.4 | -2.1 | 4.8 | 6.8 | 3.6 |
| 2016        | 18.0   | 7.0  | 6.5  | 4.3 | 11.5 | 5.2 | 28.8   | 4.3 | 14.1 | 3.6 | 14.7 | 4.4 | 16.4 | 8.0 | 5.3  | 5.8 | 11.1 | 6.2 | 5.2    | 5.8 | -1.4 | 4.6 | 6.6 | 3.9 |
| 2017        | 18.5   | 6.6  | 5.8  | 4.0 | 12.7 | 5.3 | 31.2   | 5.5 | 14.9 | 5.3 | 16.3 | 5.7 | 16.0 | 7.0 | 6.4  | 4.5 | 9.6  | 5.9 | 3.9    | 6.0 | -3.7 | 5.8 | 7.6 | 4.1 |
| 2018        | 18.2   | 10.4 | 6.8  | 7.0 | 11.4 | 5.6 | 29.4   | 4.8 | 15.8 | 3.1 | 13.6 | 5.4 | 19.3 | 8.3 | 6.6  | 5.1 | 12.7 | 6.2 | 4.8    | 4.5 | -1.3 | 4.0 | 6.1 | 2.9 |
| 91m_SOR_A   | 18.4   | 7.1  | 5.9  | 5.2 | 12.5 | 4.8 | 29.6   | 4.6 | 14.2 | 3.1 | 15.4 | 4.3 | 17.9 | 7.1 | 6.2  | 5.0 | 11.7 | 5.0 | 5.5    | 4.7 | -1.5 | 4.3 | 7.0 | 3.6 |

|             |      |      |     |     |      |     |      |     |      |     |      |     |      |     |     |     |      |     |     |     |      |     |     |     |
|-------------|------|------|-----|-----|------|-----|------|-----|------|-----|------|-----|------|-----|-----|-----|------|-----|-----|-----|------|-----|-----|-----|
| 2013        | 16.6 | 8.4  | 5.3 | 5.9 | 11.3 | 4.9 | 29.5 | 5.3 | 13.6 | 3.2 | 15.9 | 4.7 | 17.7 | 6.3 | 6.5 | 3.9 | 11.2 | 5.0 | 4.9 | 3.7 | -1.4 | 3.2 | 6.3 | 3.3 |
| 2014        | 18.7 | 5.0  | 6.1 | 4.4 | 12.7 | 4.7 | 27.6 | 3.9 | 13.5 | 3.3 | 14.1 | 4.1 | 17.9 | 6.6 | 7.7 | 5.0 | 10.2 | 4.5 | 7.2 | 5.3 | -0.2 | 4.9 | 7.3 | 3.6 |
| 2015        | 18.3 | 6.5  | 5.1 | 5.2 | 13.1 | 4.9 | 30.7 | 5.5 | 14.6 | 3.0 | 16.1 | 4.8 | 17.7 | 7.3 | 6.0 | 5.6 | 11.7 | 5.3 | 5.4 | 3.8 | -0.5 | 4.0 | 6.0 | 3.7 |
| 2016        | 18.4 | 6.8  | 6.0 | 4.4 | 12.4 | 5.0 | 29.2 | 4.1 | 14.0 | 3.0 | 15.1 | 4.2 | 17.1 | 7.9 | 5.1 | 5.6 | 11.9 | 5.1 | 5.7 | 5.3 | -1.9 | 4.2 | 7.7 | 3.7 |
| 2017        | 19.0 | 6.1  | 5.9 | 4.5 | 13.0 | 4.2 | 31.1 | 4.8 | 13.9 | 3.5 | 17.2 | 4.2 | 17.3 | 6.7 | 5.6 | 4.4 | 11.7 | 5.2 | 4.8 | 5.9 | -3.3 | 5.7 | 8.1 | 3.8 |
| 2018        | 19.6 | 10.0 | 7.2 | 6.9 | 12.4 | 4.8 | 29.5 | 3.8 | 15.6 | 2.9 | 13.9 | 3.9 | 19.6 | 7.7 | 6.3 | 5.2 | 13.3 | 5.0 | 5.1 | 4.4 | -1.4 | 4.1 | 6.5 | 3.2 |
| Grand Total | 18.2 | 7.1  | 6.1 | 5.2 | 12.1 | 4.8 | 29.2 | 4.5 | 14.6 | 3.2 | 14.6 | 4.3 | 17.5 | 7.3 | 6.4 | 5.1 | 11.1 | 5.3 | 5.3 | 4.9 | -1.6 | 4.6 | 6.9 | 3.6 |

**Table S3.3** Seasonal average and standard deviation for the AWSs under the region R3 (2013–2016).

|             | Spring |     |      |     |      |     | Summer |     |      |     |      |     | Fall |     |      |     |      |     | Winter |     |      |     |     |     |
|-------------|--------|-----|------|-----|------|-----|--------|-----|------|-----|------|-----|------|-----|------|-----|------|-----|--------|-----|------|-----|-----|-----|
|             | Tmax   |     | Tmin |     | DTR  |     | Tmax   |     | Tmin |     | DTR  |     | Tmax |     | Tmin |     | DTR  |     | Tmax   |     | Tmin |     | DTR |     |
| AWS         | av     | SD  | av   | SD  | av   | SD  | av     | SD  | av   | SD  | av   | SD  | av   | SD  | av   | SD  | av   | SD  | av     | SD  | av   | SD  | av  | SD  |
| 127m_PBK_A  | 16.5   | 7.0 | 8.4  | 5.4 | 8.1  | 5.1 | 27.9   | 5.1 | 16.7 | 3.4 | 11.1 | 4.8 | 16.6 | 7.1 | 9.2  | 6.2 | 7.3  | 4.9 | 6.7    | 5.3 | 0.9  | 4.7 | 5.8 | 3.4 |
| 2013.0      | 14.1   | 9.6 | 7.6  | 7.8 | 6.5  | 4.8 | 27.6   | 6.2 | 15.4 | 3.1 | 12.2 | 5.7 | 18.2 | 6.2 | 10.4 | 5.4 | 7.7  | 6.8 | 5.9    | 4.4 | 0.7  | 3.4 | 5.3 | 3.1 |
| 2014.0      | 17.1   | 5.3 | 9.9  | 5.0 | 7.2  | 4.9 | 26.2   | 5.3 | 19.5 | 4.9 | 6.7  | 5.9 | 13.2 | 6.4 | 9.9  | 6.6 | 3.4  | 2.9 | 8.4    | 5.8 | 2.0  | 4.5 | 6.4 | 3.9 |
| 2015.0      | 17.1   | 6.6 | 7.5  | 5.0 | 9.6  | 5.5 | 30.7   | 5.4 | 16.5 | 2.9 | 14.1 | 4.4 | 18.2 | 8.5 | 9.9  | 7.2 | 8.2  | 5.5 | 5.5    | 4.8 | 0.9  | 5.1 | 4.6 | 3.5 |
| 2016.0      | 17.7   | 6.6 | 8.8  | 3.9 | 8.9  | 5.3 | 27.0   | 3.5 | 15.5 | 2.7 | 11.4 | 3.4 | 16.7 | 7.3 | 6.7  | 5.5 | 10.0 | 4.2 | 7.0    | 6.0 | 0.1  | 5.8 | 6.9 | 3.2 |
| 80m_BCT_G_A | 20.0   | 6.5 | 6.1  | 4.9 | 13.9 | 5.6 | 30.5   | 4.7 | 14.5 | 3.2 | 16.0 | 4.7 | 18.6 | 7.9 | 6.7  | 6.5 | 11.9 | 6.0 | 6.2    | 5.6 | -0.2 | 5.2 | 6.3 | 4.6 |
| 2015.0      | 20.7   | 6.2 | 6.6  | 4.8 | 14.1 | 5.4 | 31.4   | 5.1 | 14.4 | 3.1 | 17.0 | 4.8 | 18.5 | 8.0 | 7.2  | 7.1 | 11.3 | 5.9 | 6.2    | 4.3 | 0.9  | 3.1 | 5.3 | 4.9 |
| 2016.0      | 19.4   | 6.7 | 5.6  | 4.9 | 13.8 | 5.8 | 29.7   | 4.2 | 14.6 | 3.3 | 15.0 | 4.6 | 18.7 | 7.8 | 6.3  | 5.8 | 12.5 | 6.0 | 6.2    | 6.9 | -1.2 | 7.2 | 7.4 | 4.3 |
| 82m_CRC_PI  | 18.9   | 7.0 | 6.3  | 4.8 | 12.6 | 5.4 | 30.1   | 4.6 | 14.5 | 3.5 | 15.7 | 4.8 | 18.6 | 7.4 | 7.5  | 5.4 | 11.2 | 5.1 | 7.1    | 5.3 | -0.5 | 4.8 | 7.6 | 3.9 |
| 2013.0      | 18.8   | 8.8 | 6.8  | 5.6 | 12.1 | 5.6 | 30.6   | 5.7 | 13.7 | 5.0 | 16.9 | 6.8 | 19.2 | 6.6 | 6.9  | 4.4 | 12.3 | 5.4 | 6.3    | 4.2 | -0.6 | 3.9 | 7.0 | 3.6 |
| 2014.0      | 19.2   | 5.5 | 6.9  | 4.4 | 12.3 | 5.0 | 28.7   | 3.6 | 14.3 | 2.9 | 14.4 | 4.0 | 18.5 | 6.9 | 9.0  | 5.4 | 9.5  | 4.6 | 8.8    | 5.5 | 0.4  | 4.8 | 8.4 | 4.4 |
| 2015.0      | 18.4   | 7.2 | 5.7  | 5.0 | 12.7 | 5.4 | 31.5   | 5.1 | 15.9 | 3.4 | 15.7 | 4.0 | 18.9 | 8.1 | 8.6  | 6.4 | 10.2 | 4.9 | 6.5    | 4.8 | -0.7 | 4.9 | 7.2 | 4.1 |
| 2016.0      | 19.2   | 6.5 | 5.9  | 4.4 | 13.3 | 5.5 | 29.7   | 4.1 | 14.1 | 2.9 | 15.6 | 4.4 | 17.9 | 8.2 | 5.2  | 5.5 | 12.7 | 5.4 | 6.8    | 6.5 | -1.2 | 5.5 | 8.0 | 3.6 |
| Grand Total | 18.2   | 6.9 | 7.1  | 5.1 | 11.0 | 5.3 | 29.3   | 4.8 | 15.4 | 3.4 | 13.9 | 4.8 | 17.8 | 7.4 | 8.0  | 5.9 | 9.8  | 5.2 | 6.8    | 5.3 | 0.1  | 4.8 | 6.6 | 3.8 |

**Table S3.4** Seasonal average and standard deviation for the AWSs under the region R4 (2013–2018).



|               |      |      |      |     |      |     |      |     |      |     |      |     |      |     |     |     |      |     |     |     |      |     |     |     |
|---------------|------|------|------|-----|------|-----|------|-----|------|-----|------|-----|------|-----|-----|-----|------|-----|-----|-----|------|-----|-----|-----|
| 125m_SMD_A    | 19.0 | 7.9  | 7.5  | 5.3 | 11.4 | 5.6 | 27.9 | 5.2 | 17.2 | 4.0 | 10.7 | 5.6 | 16.3 | 6.9 | 6.7 | 5.6 | 9.6  | 5.6 | 5.9 | 5.5 | -1.2 | 5.2 | 7.1 | 4.1 |
| 2015          | 18.6 | 7.3  | 7.8  | 5.2 | 10.8 | 6.0 | 27.7 | 5.6 | 18.3 | 5.6 | 9.4  | 6.4 | 15.7 | 8.5 | 6.6 | 7.2 | 9.1  | 6.4 | 6.8 | 4.5 | 0.9  | 4.4 | 5.9 | 4.6 |
| 2016          | 17.9 | 8.3  | 7.3  | 4.5 | 10.6 | 6.0 | 25.2 | 4.7 | 16.5 | 3.7 | 8.7  | 5.4 | 12.4 | 4.2 | 5.5 | 4.8 | 6.9  | 5.0 | 6.6 | 5.7 | -1.1 | 5.4 | 7.8 | 4.0 |
| 2017          | 17.7 | 4.7  | 5.0  | 3.5 | 12.7 | 4.2 | 28.9 | 7.0 | 16.6 | 3.8 | 12.3 | 6.3 | 17.1 | 6.9 | 7.5 | 5.1 | 9.6  | 5.6 | 4.3 | 6.8 | -3.6 | 6.4 | 7.9 | 4.1 |
| 2018          | 21.6 | 11.2 | 10.1 | 8.2 | 11.5 | 6.1 | 29.7 | 3.7 | 17.3 | 3.1 | 12.4 | 4.5 | 19.9 | 7.9 | 7.2 | 5.0 | 12.6 | 5.5 | 5.8 | 4.9 | -0.8 | 4.6 | 6.6 | 3.8 |
| 145m_RNS_G_Pe | 17.5 | 6.1  | 6.7  | 3.8 | 10.7 | 4.8 | 30.7 | 4.4 | 16.5 | 2.5 | 14.2 | 3.7 | 18.4 | 8.1 | 7.0 | 5.9 | 11.4 | 4.6 | 5.0 | 6.8 | -2.5 | 5.1 | 7.4 | 4.1 |
| 2016          | 19.6 | 6.9  | 7.9  | 4.2 | 11.7 | 4.8 | 30.7 | 4.4 | 16.5 | 2.5 | 14.2 | 3.7 | 18.4 | 8.1 | 7.0 | 5.9 | 11.4 | 4.6 | 6.6 | 6.2 | -0.7 | 4.5 | 7.3 | 3.9 |
| 2017          | 15.3 | 5.3  | 5.6  | 3.4 | 9.8  | 4.7 |      |     |      |     |      |     |      |     |     |     |      |     | 3.4 | 7.3 | -4.2 | 5.8 | 7.6 | 4.2 |
| 94m_SMK_G_Pr  | 18.6 | 7.3  | 7.8  | 5.0 | 10.8 | 4.4 | 29.2 | 4.4 | 16.1 | 3.0 | 13.1 | 3.6 | 18.2 | 7.4 | 7.6 | 5.1 | 10.7 | 4.6 | 6.1 | 5.7 | -0.2 | 4.6 | 6.3 | 3.3 |
| 2015          | 17.8 | 6.7  | 7.2  | 4.7 | 10.6 | 4.2 | 29.7 | 4.9 | 16.4 | 3.1 | 13.3 | 3.7 | 17.9 | 7.4 | 7.9 | 5.7 | 10.0 | 4.5 | 8.2 | 5.3 | 2.9  | 4.1 | 5.3 | 3.7 |
| 2016          | 18.2 | 6.9  | 7.5  | 4.2 | 10.6 | 4.9 | 28.2 | 3.9 | 15.6 | 2.9 | 12.6 | 3.6 | 17.2 | 7.7 | 6.8 | 5.4 | 10.5 | 4.4 | 6.4 | 5.8 | -0.7 | 4.6 | 7.1 | 3.2 |
| 2017          | 18.9 | 6.2  | 7.8  | 4.4 | 11.2 | 4.2 | 30.5 | 4.6 | 16.1 | 3.4 | 14.3 | 3.5 | 17.5 | 6.6 | 7.4 | 4.2 | 10.1 | 4.5 | 4.4 | 7.1 | -2.8 | 5.9 | 7.2 | 3.6 |
| 2018          | 19.4 | 9.3  | 8.6  | 6.6 | 10.8 | 4.4 | 28.5 | 4.2 | 16.4 | 2.6 | 12.2 | 3.8 | 20.2 | 8.0 | 8.1 | 5.1 | 12.0 | 5.0 | 5.5 | 4.5 | -0.2 | 3.7 | 5.8 | 2.8 |
| Grand Total   | 18.5 | 7.3  | 7.5  | 4.9 | 11.0 | 4.9 | 29.3 | 4.7 | 16.6 | 3.2 | 12.7 | 4.3 | 17.4 | 7.3 | 7.1 | 5.4 | 10.3 | 5.1 | 5.8 | 5.8 | -1.0 | 4.9 | 6.8 | 3.8 |
