# Supplementary material
Source: MDPI journal article supplement (https://www.mdpi.com/2073-4433/12/10/1279)
Supplement: s1 [file s1]

## Supplementary Material S1

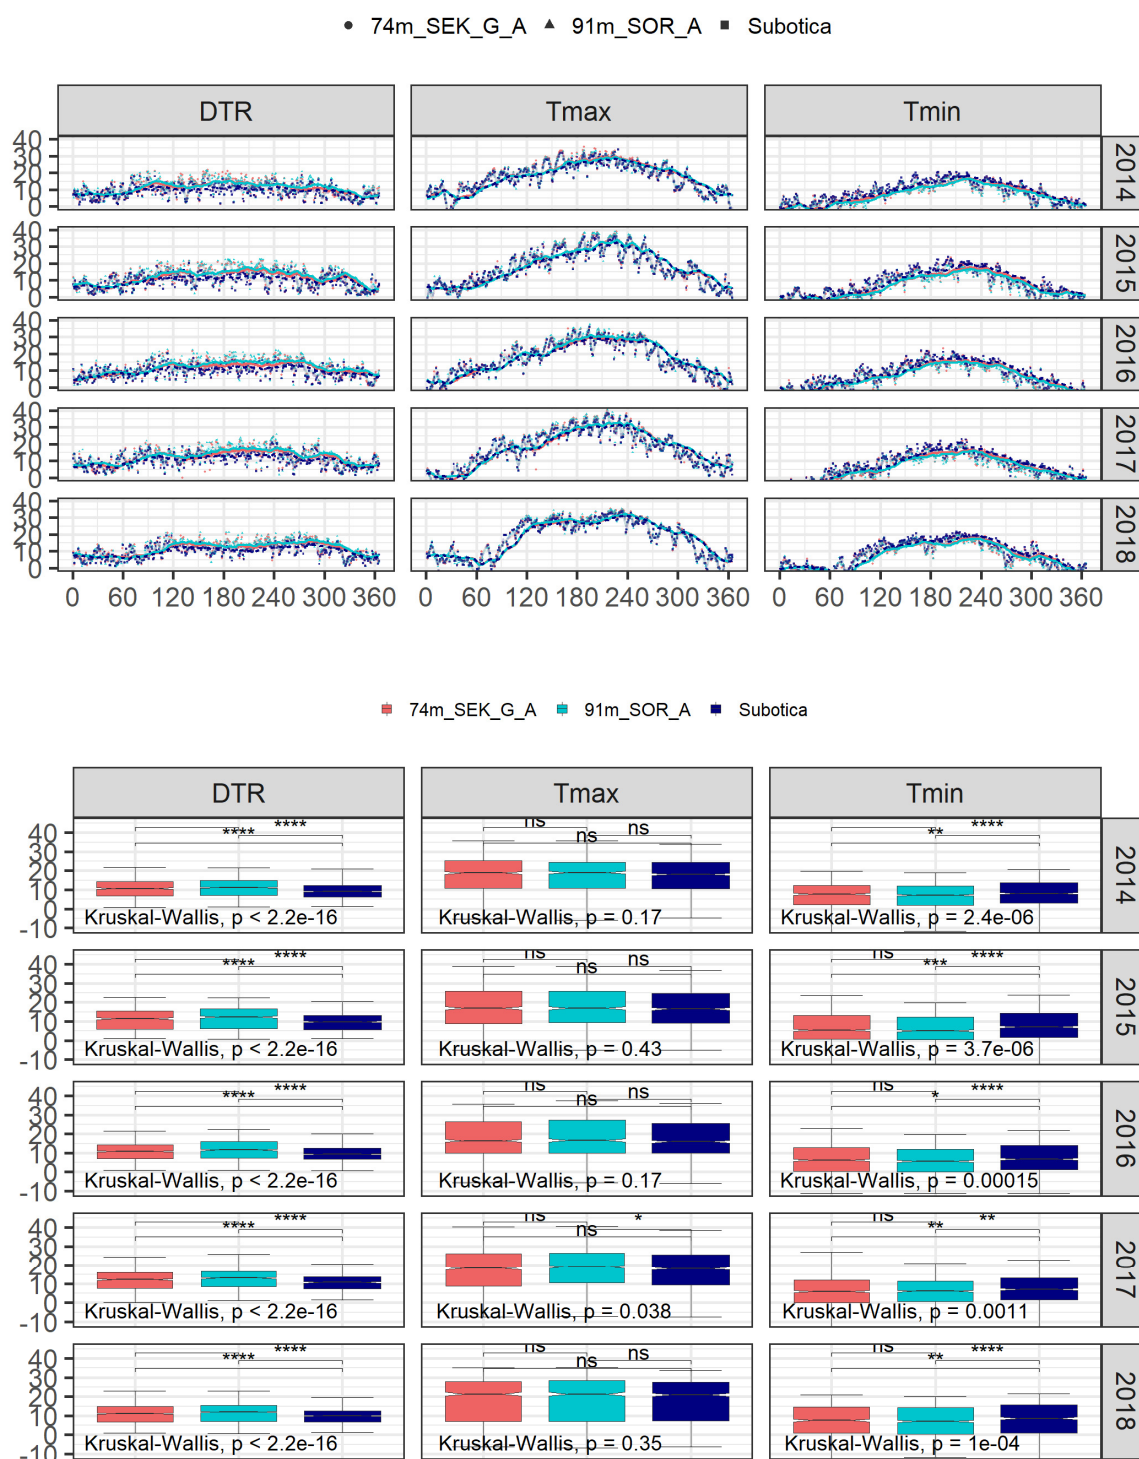

**Figure S1.1**  $T_{max}$ ,  $T_{min}$  and DTR measured on the AWSs located in the apple orchards (74m\_SEK\_G\_A - clay soil, 91m\_SOR\_A - sandy loam) and climatological station Subotica (dashed blue line) in the R2 region. The following convention for symbols indicate statistical significance: (not significant (ns):  $p > 0.05$ ), (\*:  $p \leq 0.05$ ), (\*\*:  $p \leq 0.01$ ), (\*\*\*:  $p \leq 0.001$ ), (\*\*\*\*:  $p \leq 0.0001$ ) number of stars indicate growing differences between data distribution.

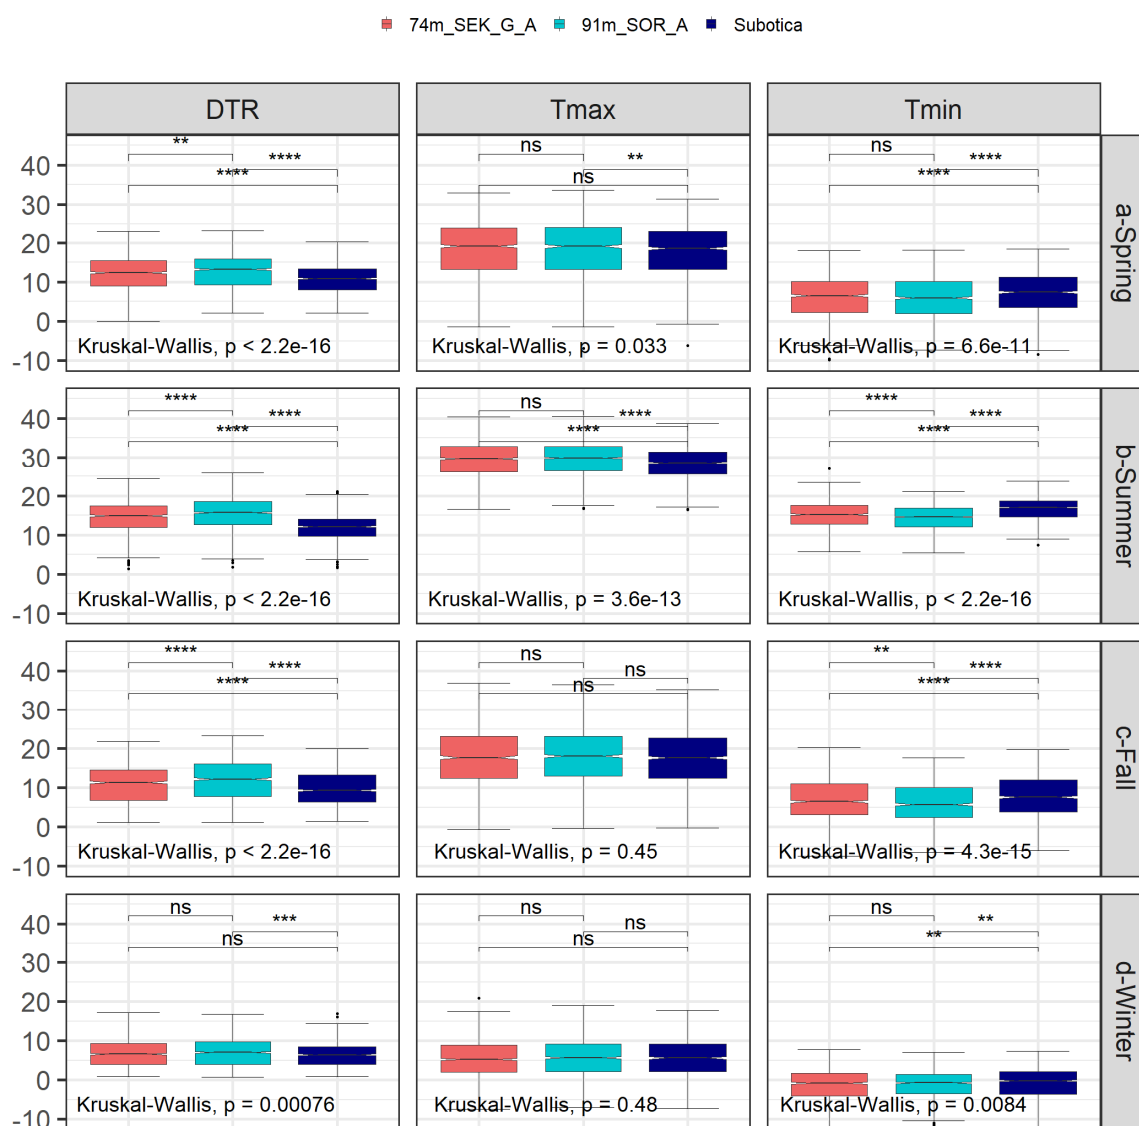

**Figure S1.2** Seasonal variation of  $T_{\max}$ ,  $T_{\min}$  and DTR measured on the AWSs located in the apple orchards (74m\_SEK\_G\_A - clay soil, 91m\_SOR\_A - sandy loam) and climatological station Subotica (dashed blue line) in the period 2014-2018. The following convention for symbols indicate statistical significance: : (not significant (ns):  $p > 0.05$ ), (\*:  $p \leq 0.05$ ), (\*\*:  $p \leq 0.01$ ), (\*\*\*:  $p \leq 0.001$ ), (\*\*\*\*:  $p \leq 0.0001$ ) number of stars indicate growing differences between data distribution.

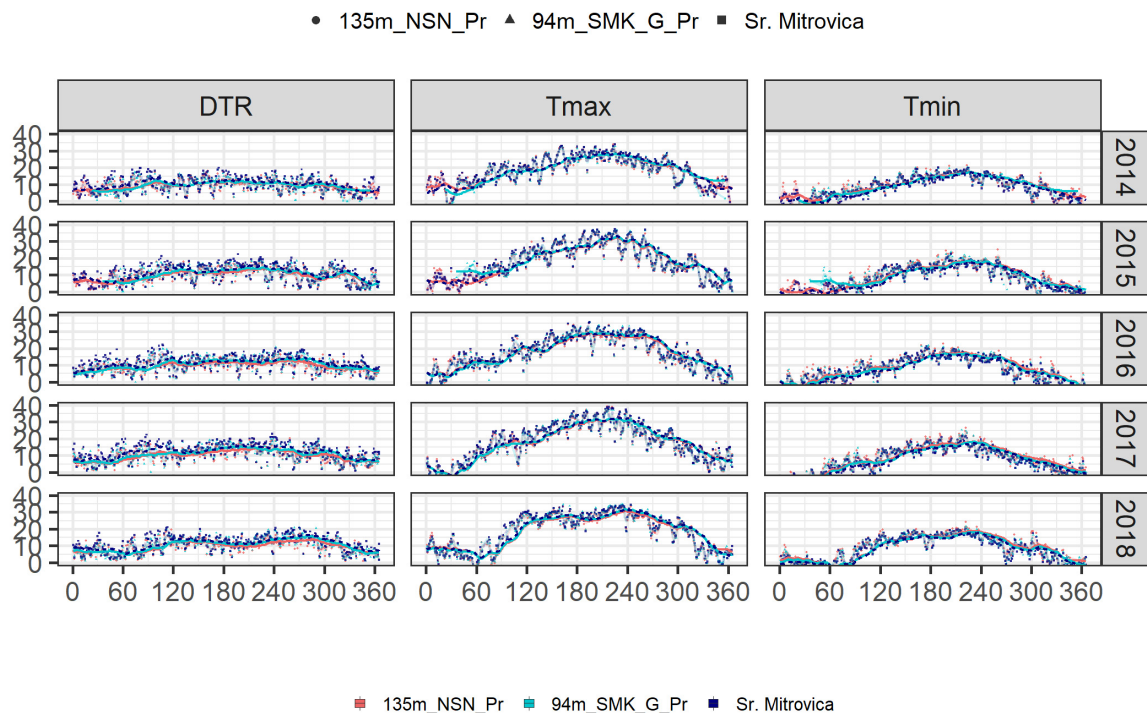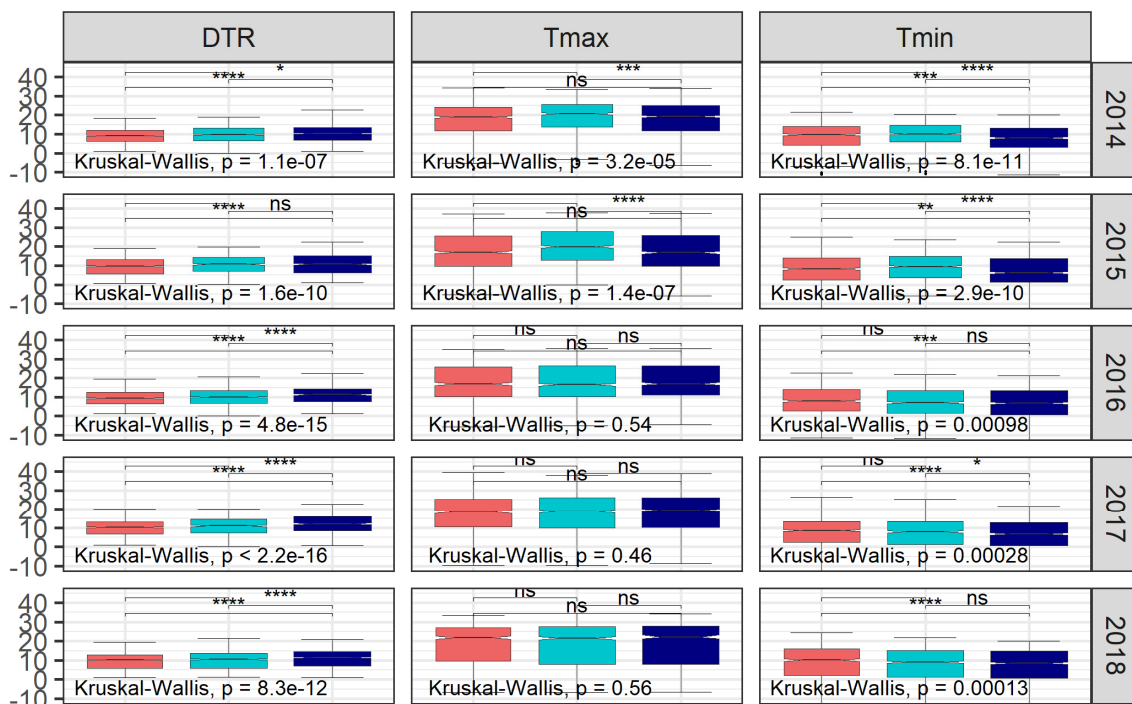

**Figure S1.3**  $T_{max}$ ,  $T_{min}$  and DTR measured on the AWSs located in the pear orchards (135m\_NSN\_Pr and 94\_SMK\_G\_Pr) and climatological station Sr. Mitrovica (dashed blue line) in the R5 region. The following convention for symbols indicate statistical significance: : (not significant (ns):  $p > 0.05$ ), (\*:  $p \leq 0.05$ ), (\*\*:  $p \leq 0.01$ ), (\*\*\*:  $p \leq 0.001$ ), (\*\*\*\*:  $p \leq 0.0001$ ) number of stars indicate growing differences between data distribution.

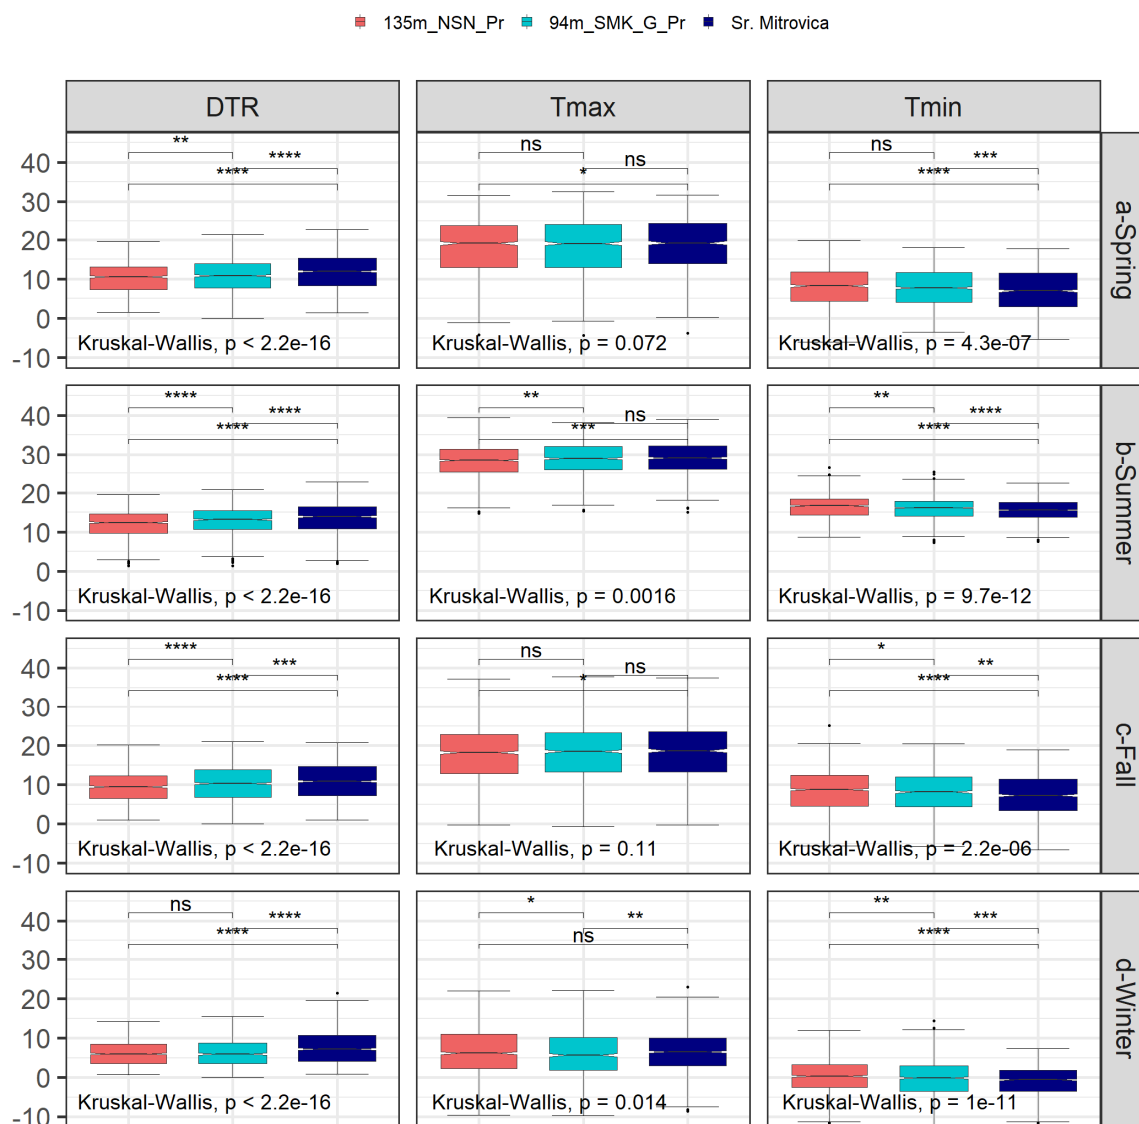

**Figure S1.4** Seasonal variation of  $T_{\max}$ ,  $T_{\min}$  and DTR measured on the AWSs located in the pear orchards (135m\_NSN\_Pr and 94\_SMK\_G\_Pr) and climatological station Sr. Mitrovica in the R5 region during the period 2014-2018. The following convention for symbols indicate statistical significance: : (not significant (ns):  $p > 0.05$ ), (\*:  $p \leq 0.05$ ), (\*\*:  $p \leq 0.01$ ), (\*\*\*:  $p \leq 0.001$ ), (\*\*\*\*:  $p \leq 0.0001$ ) number of stars indicate growing differences between data distribution.

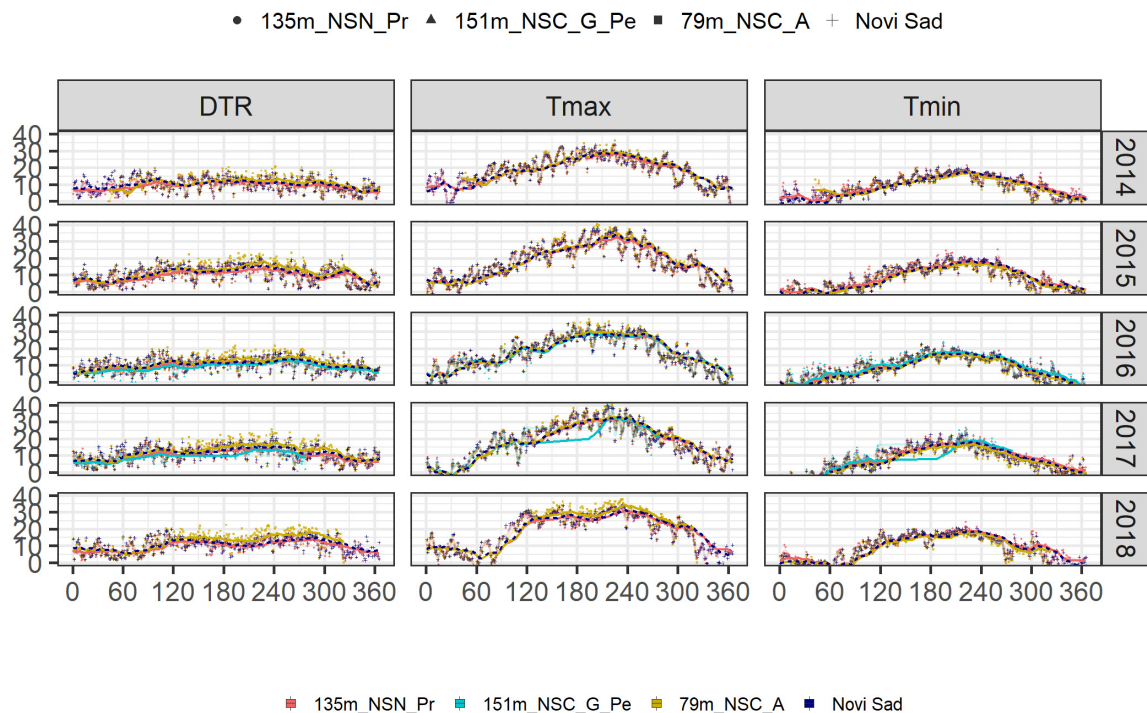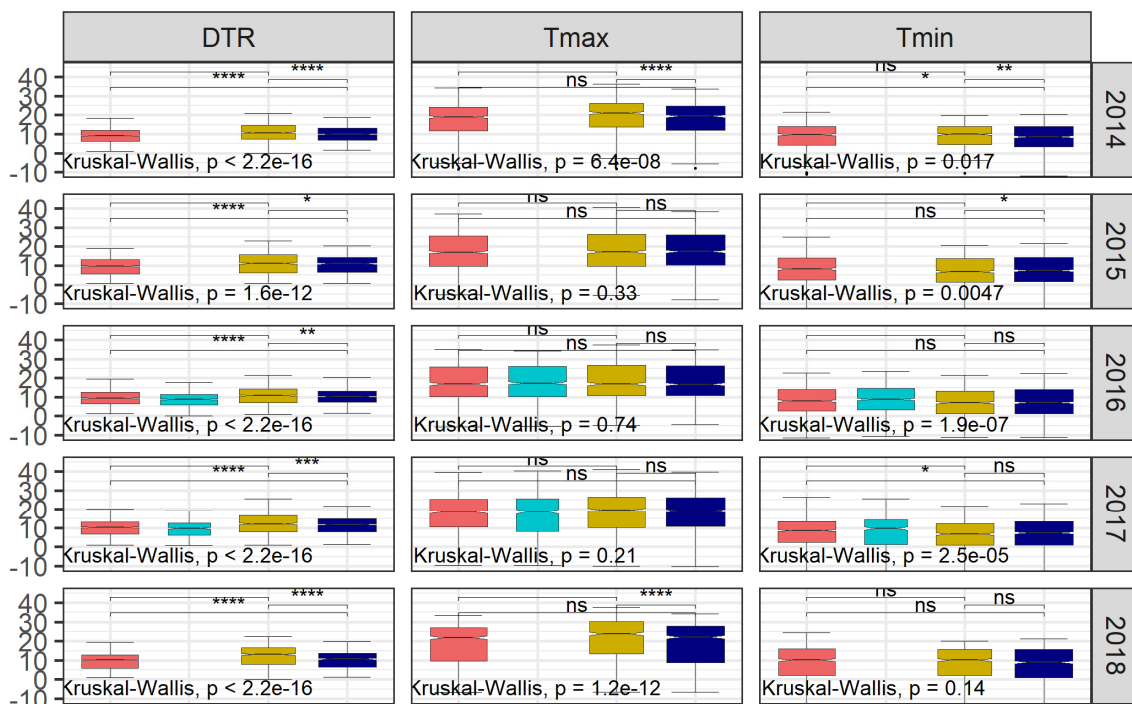

**Figure S1.5**  $T_{max}$ ,  $T_{min}$  and DTR measured on the AWSs located in the pear orchards (135m\_NSN\_Pr), peach (151m\_NSC\_G\_Pe) and apple (79m\_NSC\_A) and climatological station Novi Sad (dashed blue line) in the R1 region. The following convention for symbols indicate statistical significance: : (not significant (ns):  $p > 0.05$ ), (\*:  $p \leq 0.05$ ), (\*\*:  $p \leq 0.01$ ), (\*\*\*:  $p \leq 0.001$ ), (\*\*\*\*:  $p \leq 0.0001$ ) number of stars indicate growing differences between data distribution.

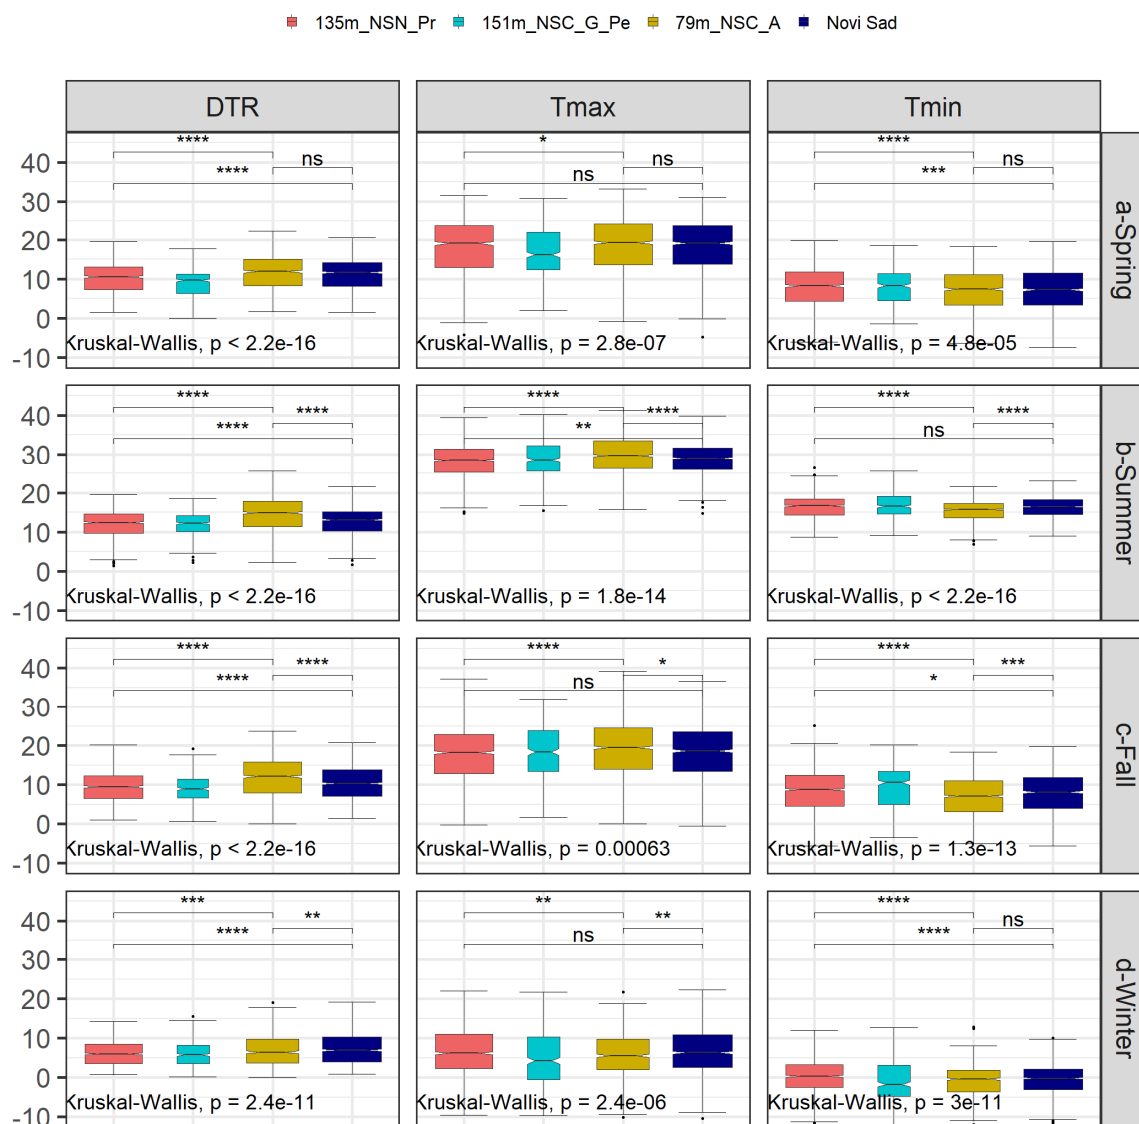

**Figure S1.6** Seasonal variation of  $T_{max}$ ,  $T_{min}$  and DTR measured on the AWSs located in the pear orchards (135m\_NSN\_Pr), peach (151m\_NSC\_G\_Pe) and apple (79m\_NSC\_A) and climatological station Novi Sad (dashed blue line) in the R1 region. The following convention for symbols indicate statistical significance: [: (not significant (ns):  $p > 0.05$ ), (\*:  $p \leq 0.05$ ), (\*\*:  $p \leq 0.01$ ), (\*\*\*:  $p \leq 0.001$ ), (\*\*\*\*:  $p \leq 0.0001$ ) number of stars indicate growing differences between data distribution.
