# Supplementary material
Source: MDPI journal article supplement (https://www.mdpi.com/2073-4433/12/10/1279)
Supplement: s1 [file s1]

## Supplementary Material S4

Table S4. Values of p from K-W test and Dunn's test for pairs where  $p \geq 0.05$ .

| Paring        | p Tmax | Paring       | p Tmin | Paring      | p DTR  |
|---------------|--------|--------------|--------|-------------|--------|
| R1            |        |              |        |             |        |
| 151m_NSC_G_Pe | 0.3690 |              |        |             |        |
| 135m_NSN_Pr   |        |              |        |             |        |
| 80m_NSK_A     | 1      | 80m_NSK_A    | 1      | 80m_NSK_A   | 1      |
| 79m_NSC_A     |        | 79m_NSC_A    |        | 79m_NSC_A   |        |
| 78m_VRV_Pl    | 1      |              |        |             |        |
| 151m_NSC_G_Pe |        |              |        |             |        |
| R2            |        |              |        |             |        |
| 91m_SOR_A     | 0.0572 |              |        |             |        |
| 74m_SEK_G_A   |        |              |        |             |        |
| 91m_SBV_Pe    | 0.8251 | 91m_SBV_Pe   | 0.3565 | 91m_SBV_Pe  | 0.9620 |
| 74m_SEK_G_A   |        | 74m_SEK_G_A  |        | 74m_SEK_G_A |        |
|               |        |              |        | 74m_SEK_G_A | 1      |
|               |        |              |        | 119m_SLj_A  |        |
|               |        |              |        | 91m_SBV_Pe  | 1      |
|               |        |              |        | 119m_SLj_A  |        |
| R3            |        |              |        |             |        |
| 90m_CRC_A     | 0.14   | 90m_CRC_A    | 0.334  | 90m_CRC_A   | 1      |
| 80m_BCT_G_A   |        | 80m_BCT_G_A  |        | 80m_BCT_G_A |        |
| R4            |        |              |        |             |        |
| 85m_ZNM_A     | 0.596  |              |        | 85m_ZNM_A   | 0.1128 |
| 71m_KIK_Pl    |        |              |        | 71m_KIK_Pl  |        |
| R5            |        |              |        |             |        |
| 94m_SMK_G_Pr  | 0.1312 | 94m_SMK_G_Pr | 0.2884 |             |        |
| 125_SMD_A     |        | 125_SMD_A    |        |             |        |
