# Supplementary material
Source: MDPI journal article supplement (https://www.mdpi.com/2073-4433/12/10/1279)
Supplement: s1 [file s1]

## Supplementary Material S5

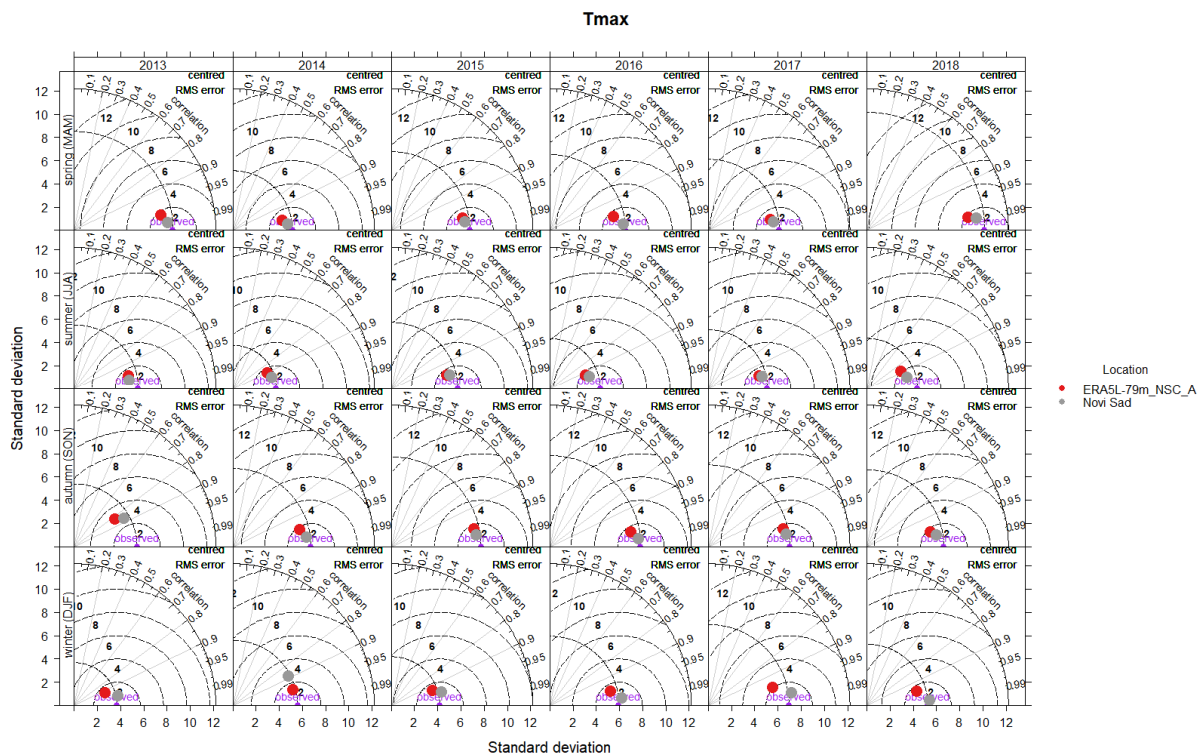

**Figure S5.1** Seasonal Taylor diagram of the  $T_{\max}$  during the period 2013–2018 observed on 79m\_NSC\_A AWS in respect to Novi Sad climatological station and ERA5-Land reanalysis for the point closest to 79m\_NSC\_A.

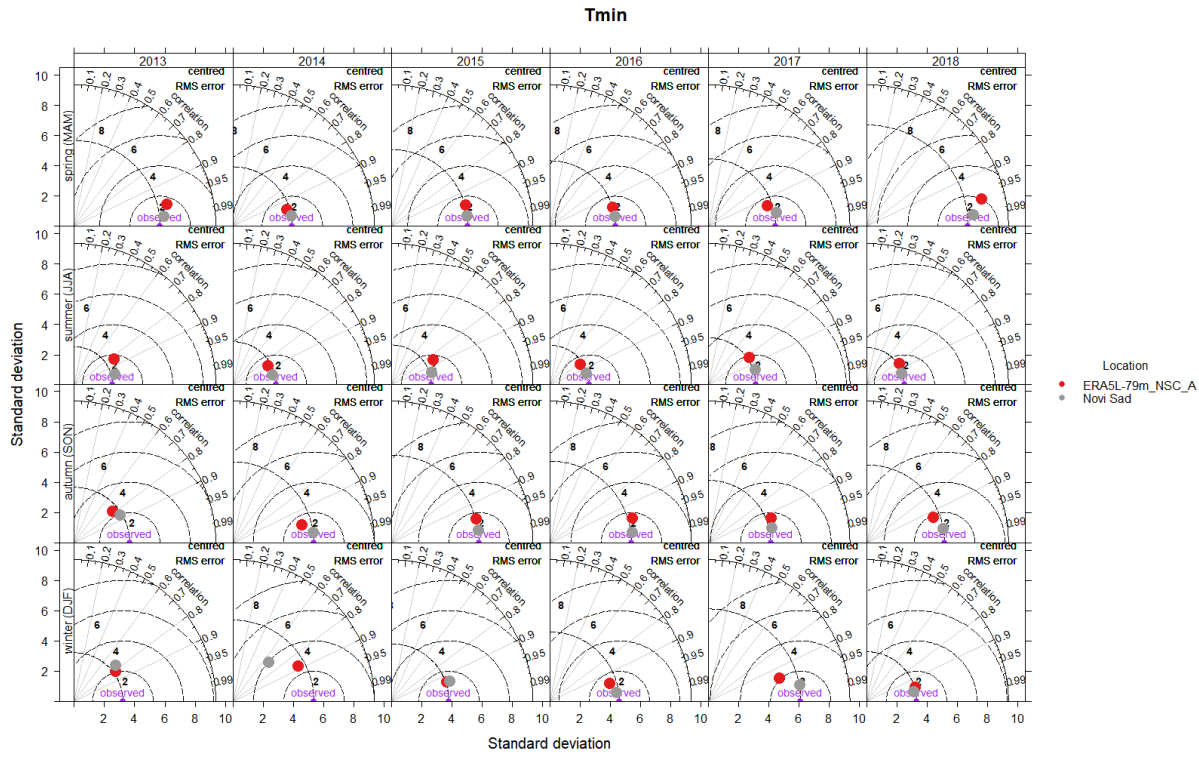

**Figure S5.2** Seasonal Taylor diagram of the  $T_{min}$  during the period 2013–2018 observed on 79m\_NSC\_A AWS in respect to Novi Sad climatological station and ERA5-Land reanalysis for the point closest to 79m\_NSC\_A.

# DTR

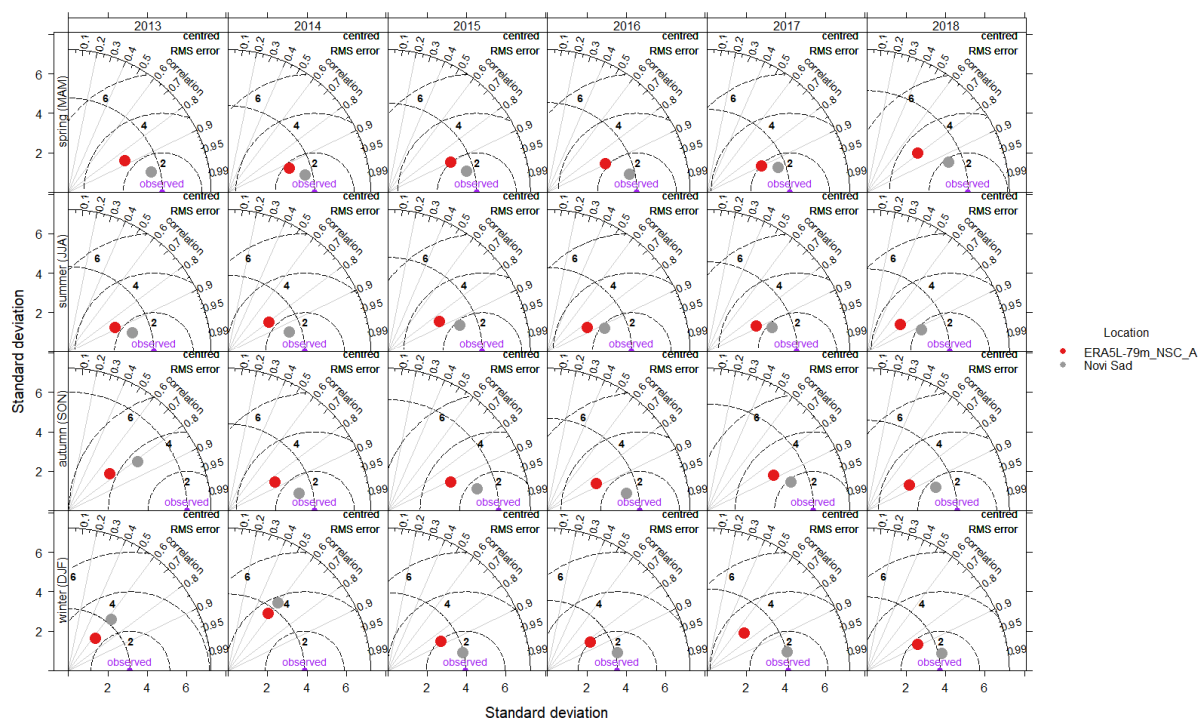

**Figure S5.3** Seasonal Taylor diagram of the DTR during the period 2013–2018 observed on 79m\_NSC\_A AWS in respect to Novi Sad climatological station and ERA5-Land reanalysis for the point closest to 79m\_NSC\_A.

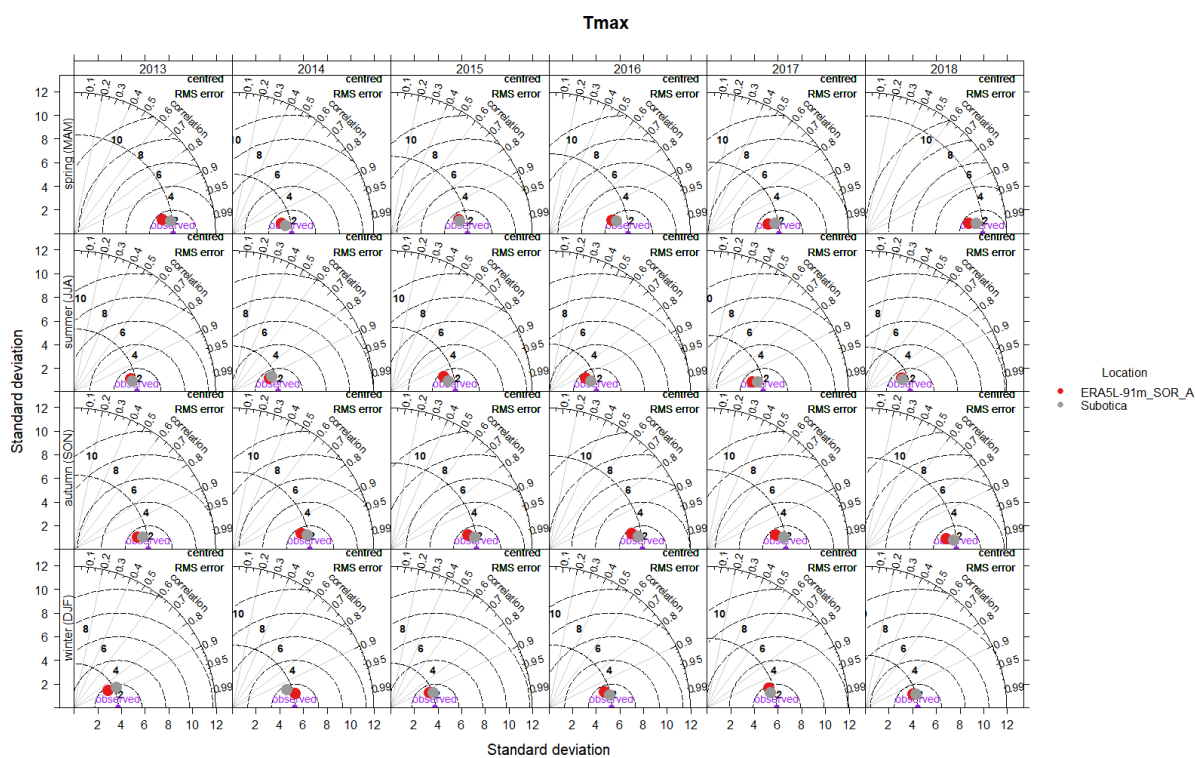

**Figure S5.4** Seasonal Taylor diagram of the T<sub>max</sub> during the period 2013–2018 observed on 91m\_SOR\_A AWS in respect to Subotica climatological station and ERA5-Land reanalysis for the point closest to 91m\_SOR\_A.

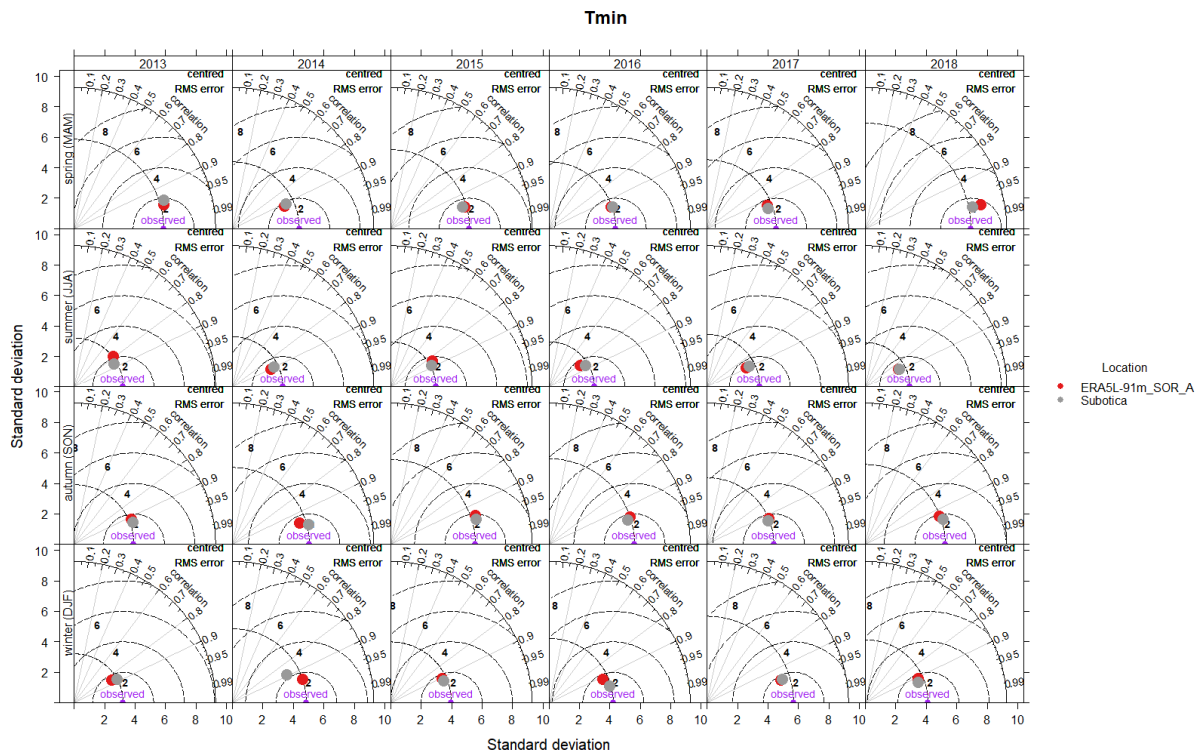

**Figure S5.5** Seasonal Taylor diagram of the  $T_{min}$  during the period 2013–2018 observed on 91m\_SOR\_A AWS in respect to Subotica climatological station and ERA5-Land reanalysis for the point closest to 91m\_SOR\_A.

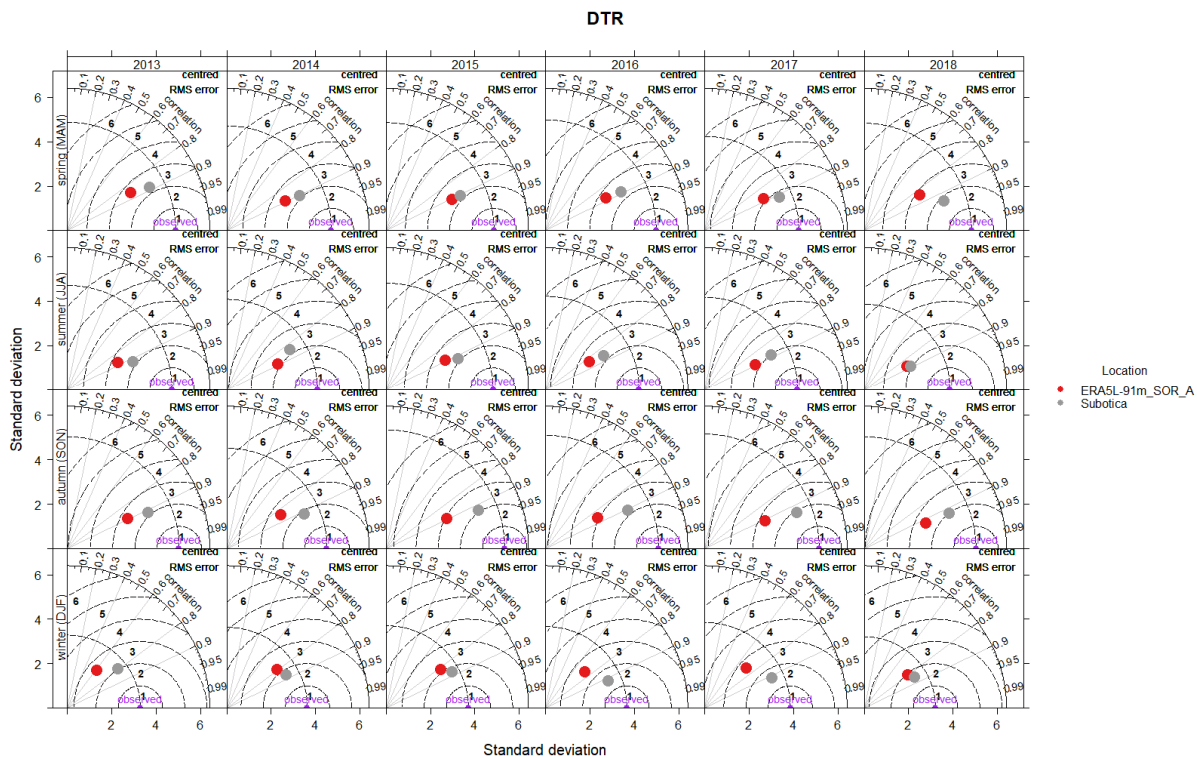

**Figure S5.6** Seasonal Taylor diagram of the DTR during the period 2013–2018 observed on 91m\_SOR\_A AWS in respect to Subotica climatological station and ERA5-Land reanalysis for the point closest to 91m\_SOR\_A.

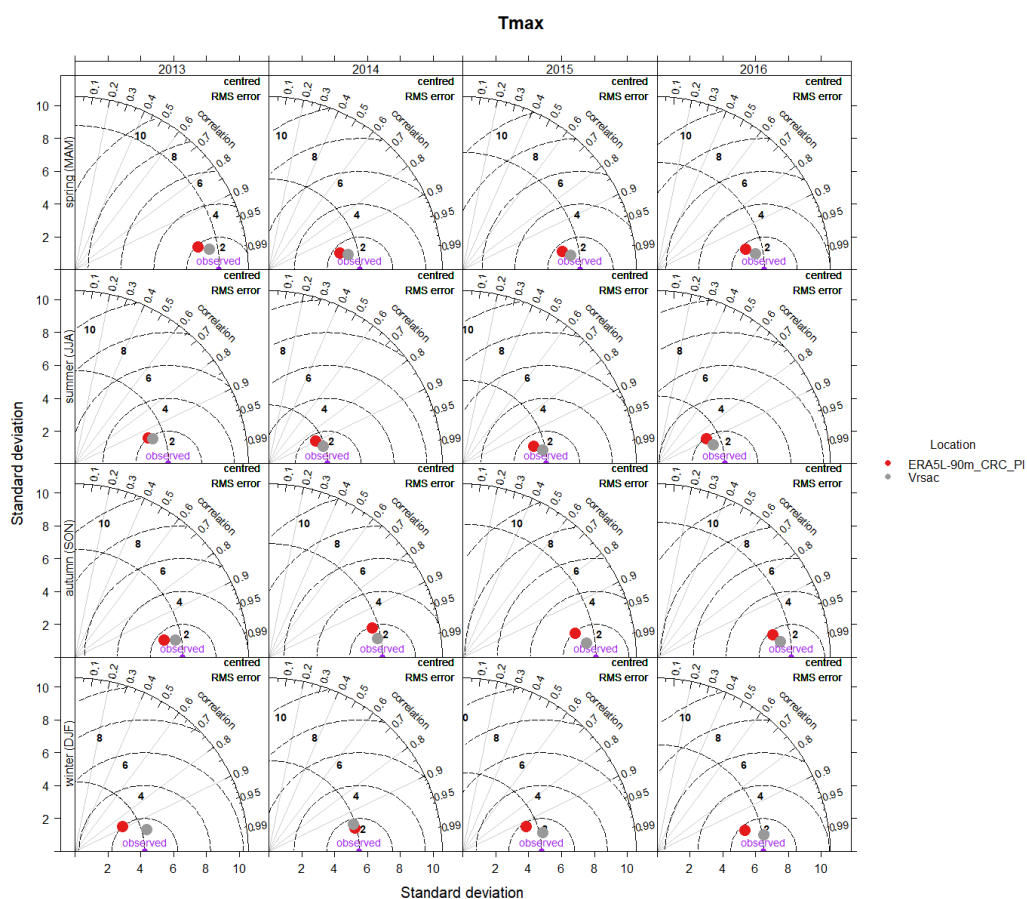

**Figure S5.7** Seasonal Taylor diagram of the  $T_{max}$  during the period 2013–2016 observed on 90m\_CRC\_PI AWS in respect to Vrsac climatological station and ERA5-Land reanalysis for the point closest to 90m\_CRC\_PI.



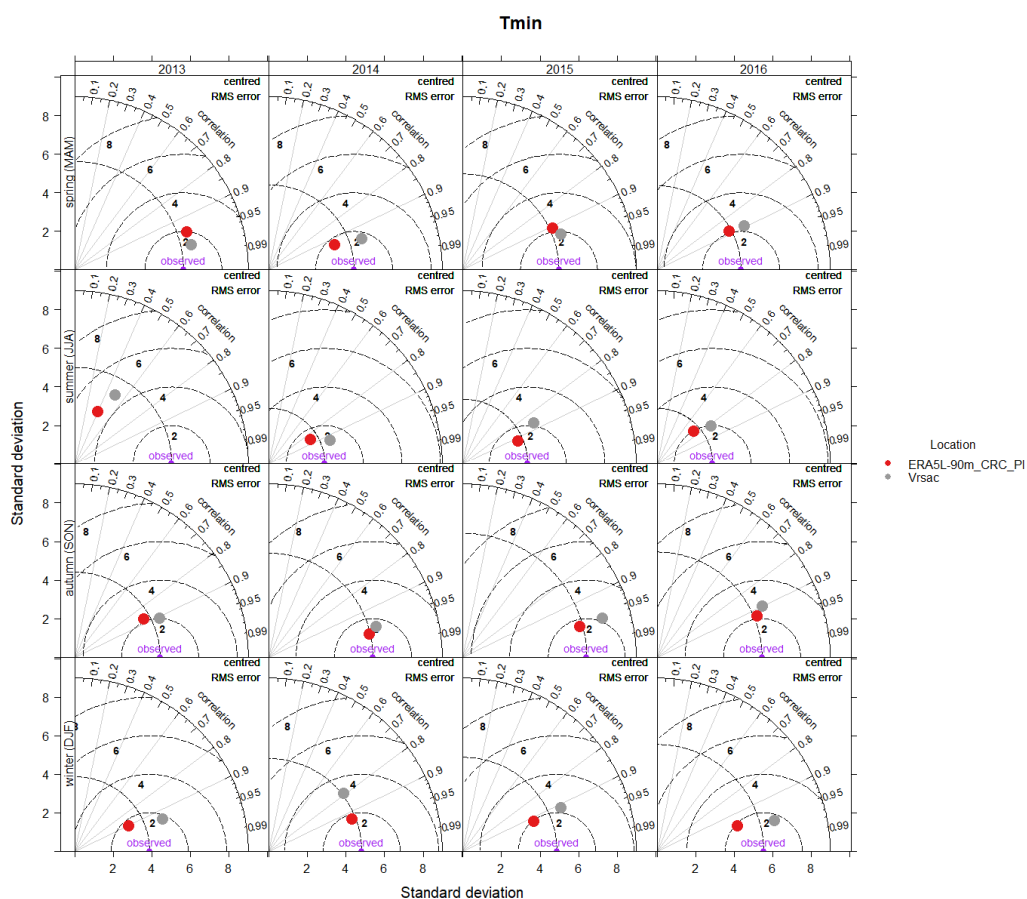

**Figure S5.8** Seasonal Taylor diagram of the  $T_{min}$  during the period 2013–2016 observed on 90m\_CRC\_PI AWS in respect to Vrsac climatological station and ERA5-Land reanalysis for the point closest to 90m\_CRC\_PI.

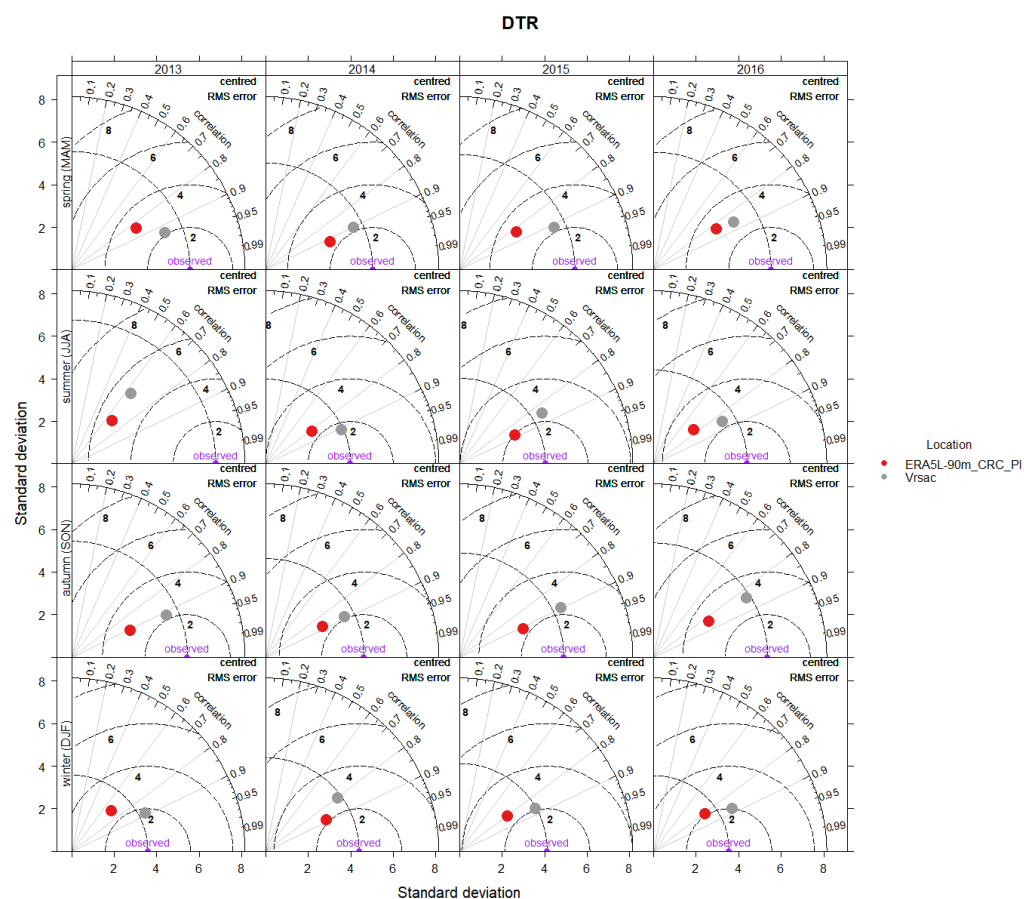



**Figure S5.9** Seasonal Taylor diagram of the DTR during the period 2013–2018 observed on 90m\_CRC\_Pl AWS in respect to Vrsac climatological station and ERA5-Land reanalysis for the point closest to 90m\_CRC\_Pl.

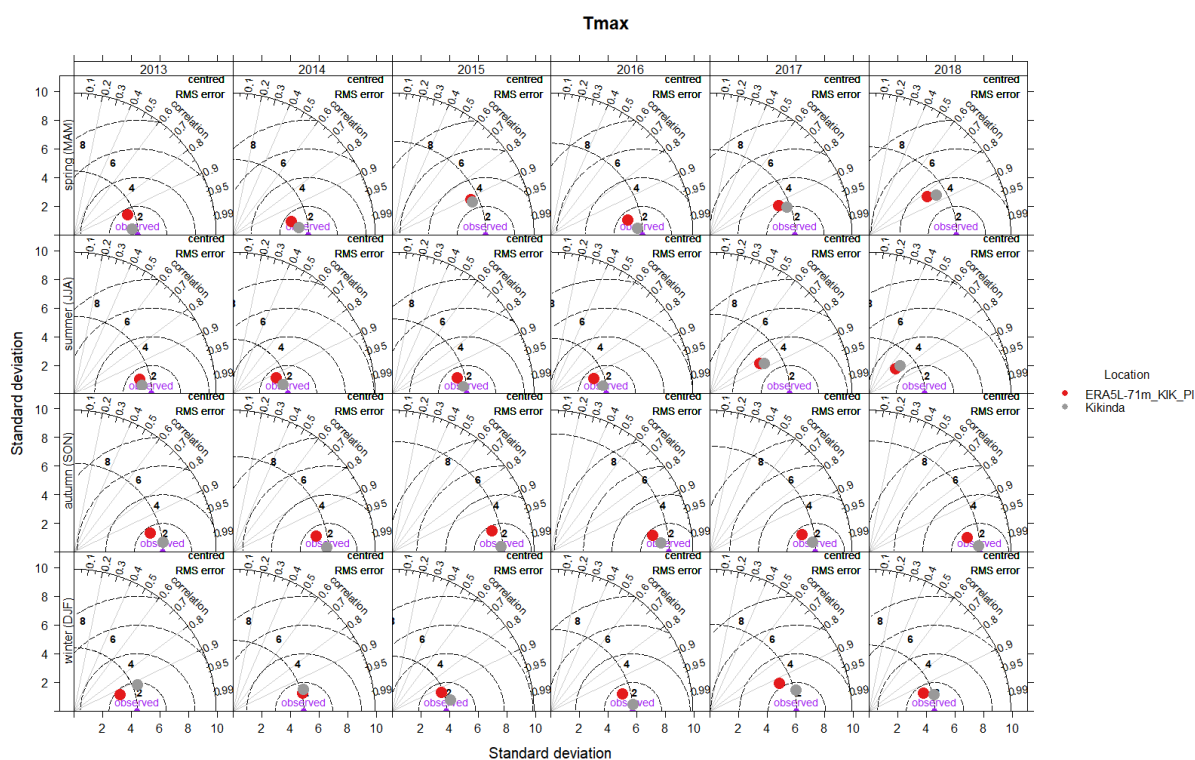

**Figure S5.10** Seasonal Taylor diagram of the  $T_{\max}$  during the period 2013–2018 observed on 71m\_KIK\_PI AWS in respect to Kikinda climatological station and ERA5-Land reanalysis for the point closest to 71m\_KIK\_PI.

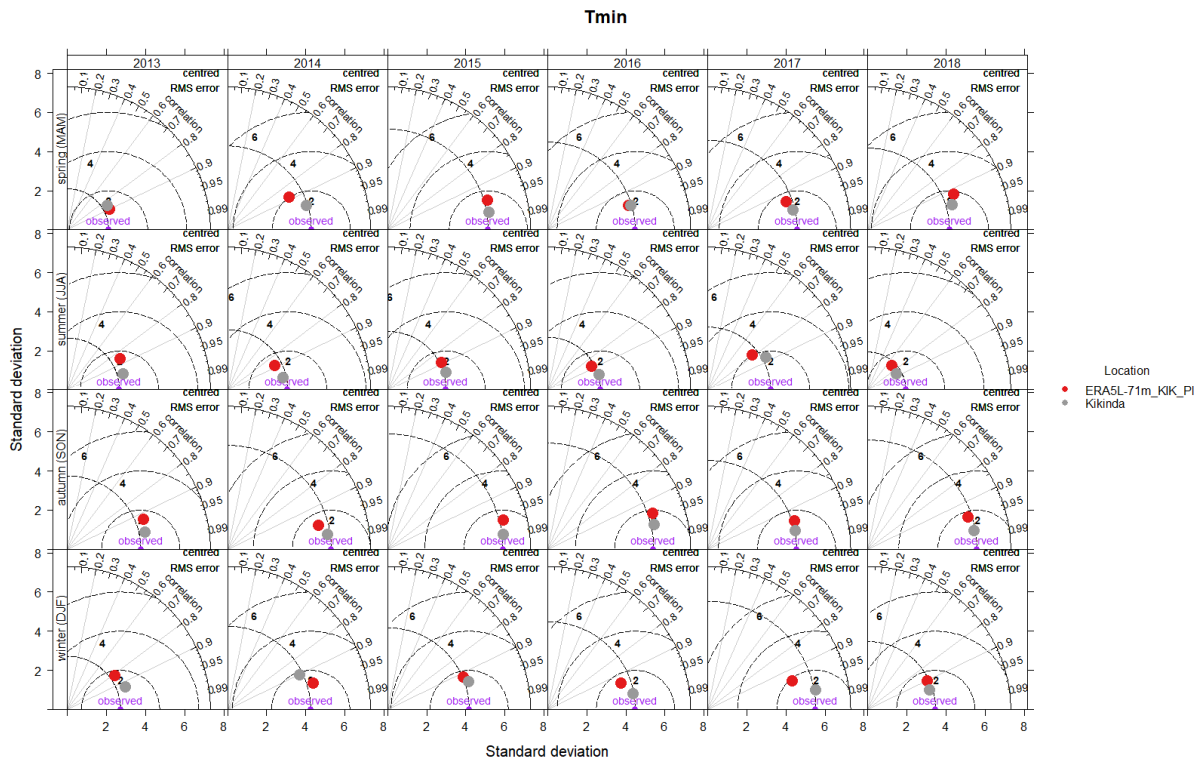

**Figure S5.11** Seasonal Taylor diagram of the  $T_{min}$  during the period 2013–2018 observed on 71m\_KIK\_PL AWS in respect to Kikinda climatological station and ERA5-Land reanalysis for the point closest to 71m\_KIK\_PL.

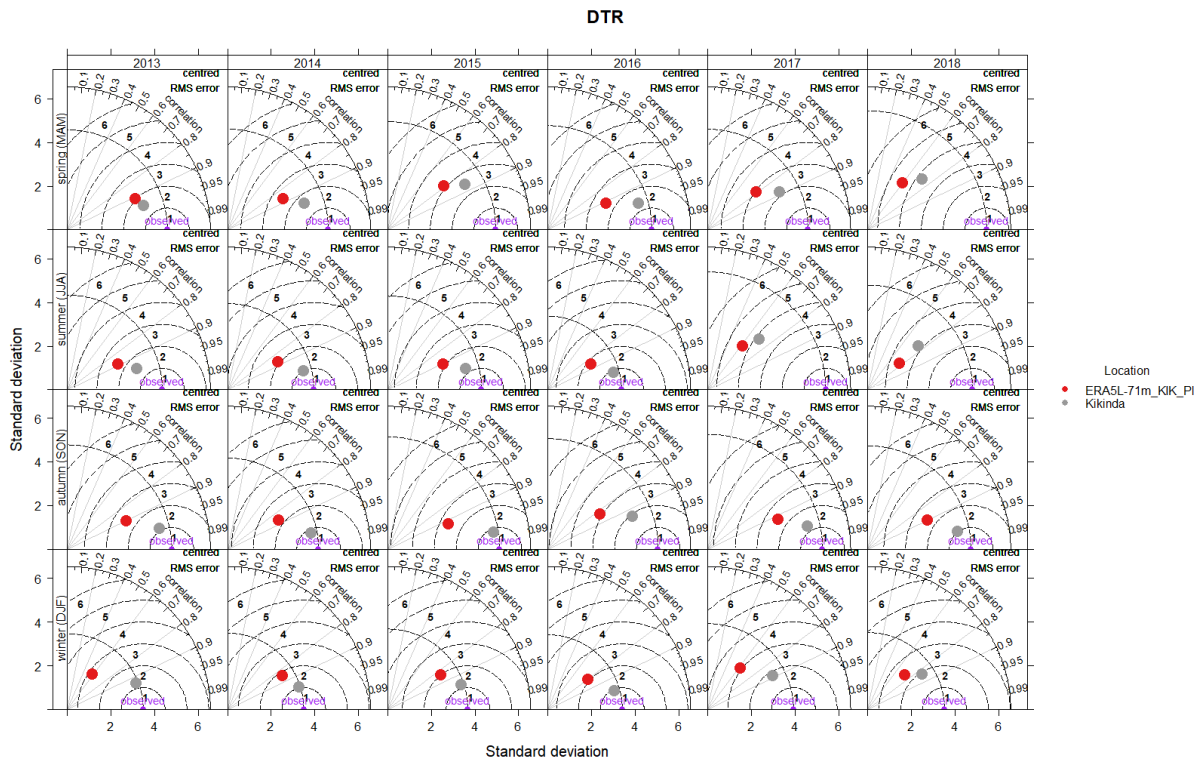

**Figure S5.12** Seasonal Taylor diagram of the DTR during the period 2013–2018 observed on 71m\_KIK\_Pl AWS in respect to Kikinda climatological station and ERA5-Land reanalysis for the point closest to 71m\_KIK\_Pl.

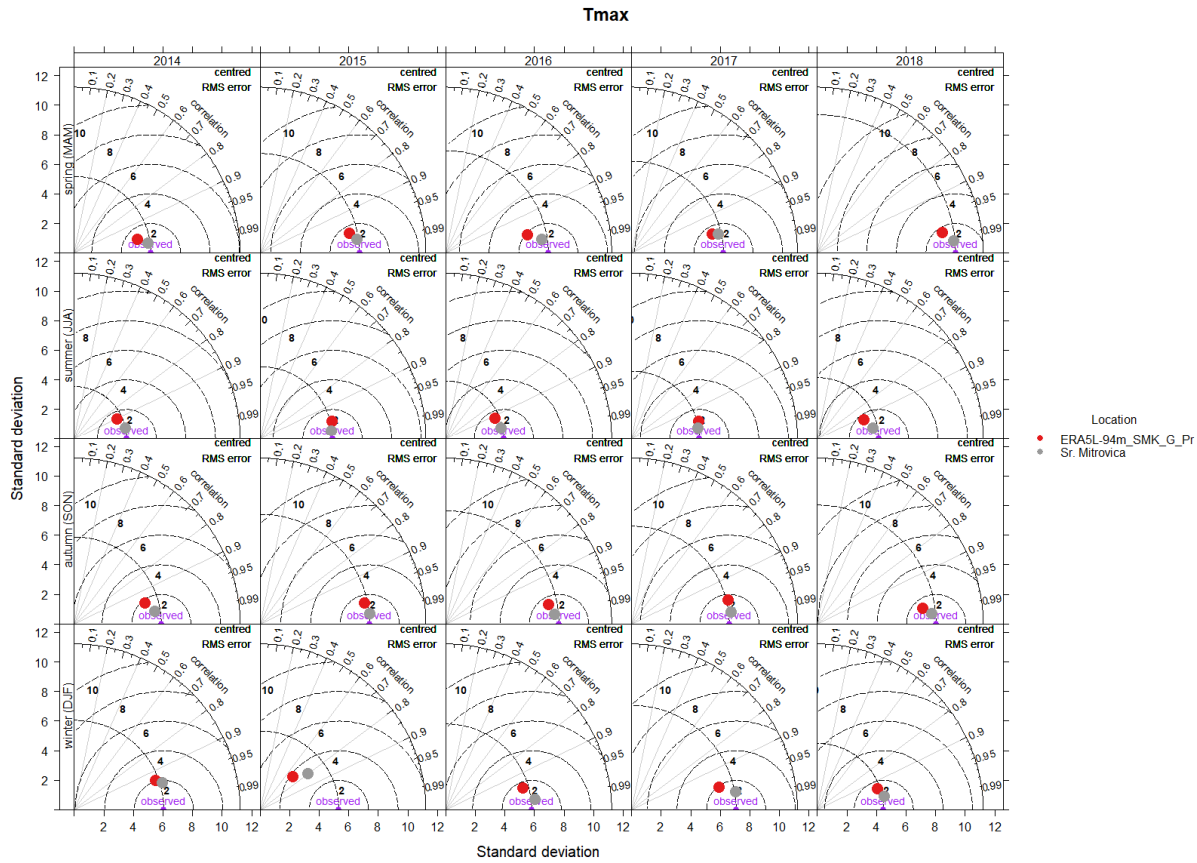

**Figure S5.13** Seasonal Taylor diagram of the  $T_{max}$  during the period 2013–2018 observed on 94m\_SMK\_G\_Pr AWS in respect to Sr. Mitrovica climatological station and ERA5-Land reanalysis for the point closest to 94m\_SMK\_G\_Pr.

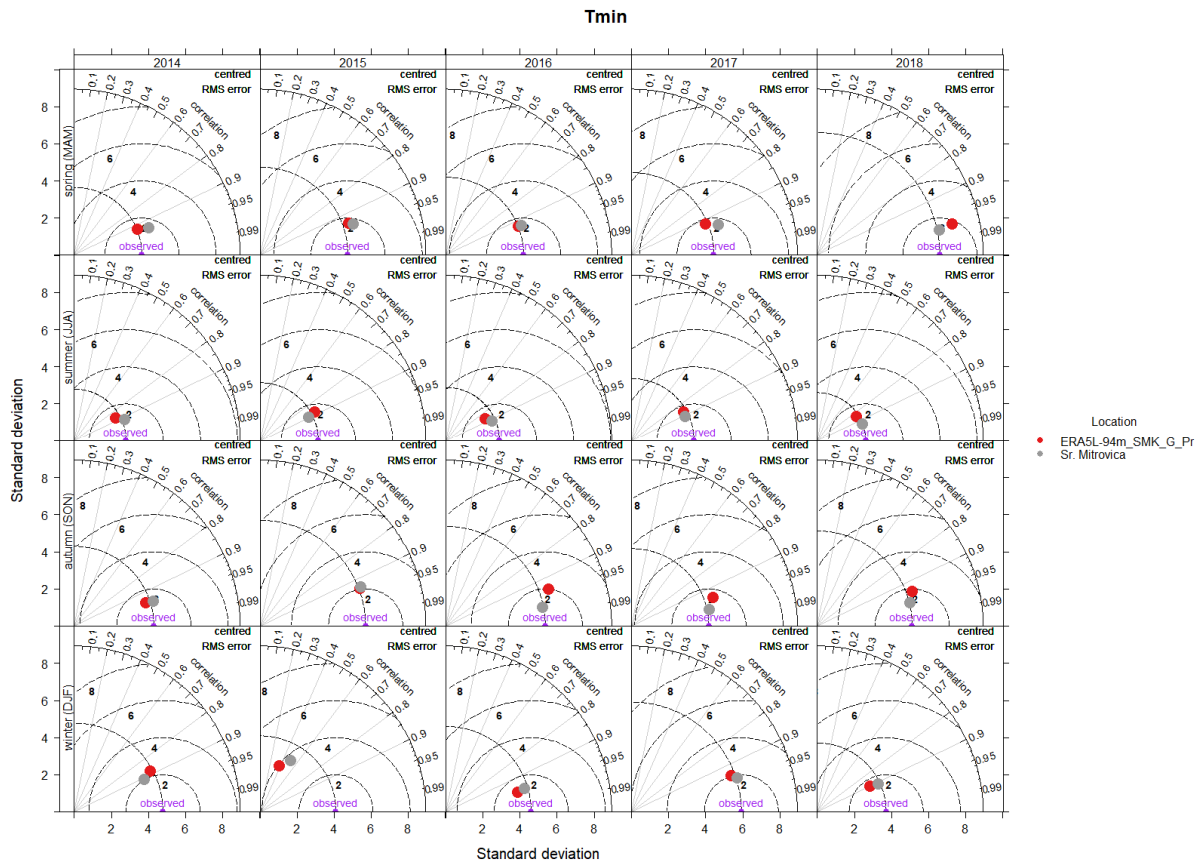

**Figure S5.14** Seasonal Taylor diagram of the  $T_{min}$  during the period 2013–2018 observed on 94m\_SMK\_G\_Pr AWS in respect to Sr. Mitrovica climatological station and ERA5-Land reanalysis for the point closest to 94m\_SMK\_G\_Pr.

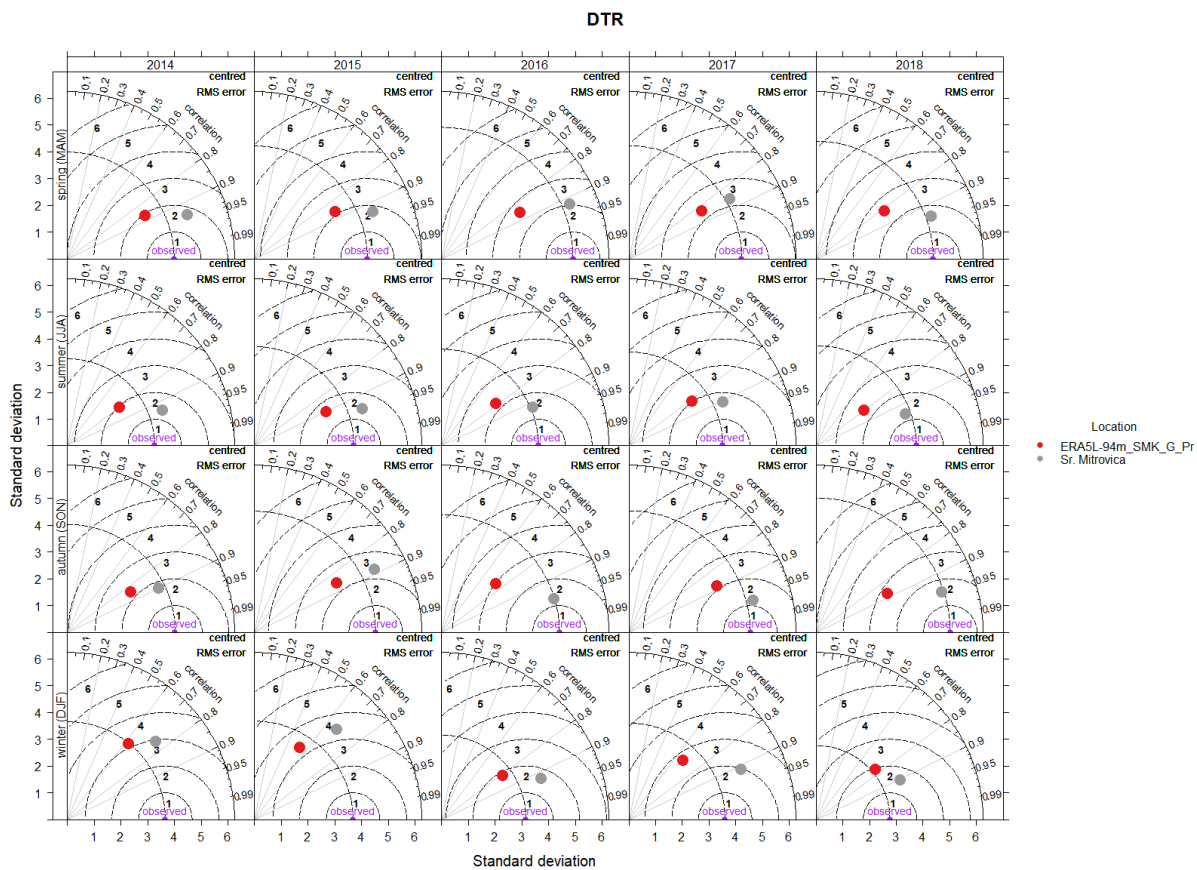



**Figure S5.15** Seasonal Taylor diagram of the DTR during the period 2013–2018 observed on 94m\_SMK\_G\_Pr AWS in respect to Sr. Mitrovica climatological station and ERA5-Land reanalysis for the point closest to 94m\_SMK\_G\_Pr.
