# Supplementary material
Source: MDPI journal article supplement (https://www.mdpi.com/2073-4433/12/10/1279)
Supplement: s1 [file s1]

## Supplementary Material S6

**Table S6.** Average of standard deviation (SD), centered root-mean-square error (RMSE), and Pearson correlation coefficient (CC) for Tmax, Tmin and DTR for 5 selected AWSs (observed), corresponding ERA-Land data and closest climatological station (model).

|      | Tmax       |           |             |      |          |             |      | Tmin       |           |             |      |          |             |      | DTR        |           |             |      |          |             |      |
|------|------------|-----------|-------------|------|----------|-------------|------|------------|-----------|-------------|------|----------|-------------|------|------------|-----------|-------------|------|----------|-------------|------|
| R1   | 79m_NSC_A  | ERA5-Land |             |      | Novi Sad |             |      | 79m_NSC_A  | ERA5-Land |             |      | Novi Sad |             |      | 79m_NSC_A  | ERA5-Land |             |      | Novi Sad |             |      |
| Year | SD         | SD        | RMSE        | CC   | SD       | RMSE        | CC   | SD         | SD        | RMSE        | CC   | SD       | RMSE        | CC   | SD         | SD        | RMSE        | CC   | SD       | RMSE        | CC   |
| 2013 | 9.8        | 8.6       | 2.20        | 0.98 | 9.0      | 1.65        | 0.99 | 6.0        | 7.1       | 2.75        | 0.96 | 6.5      | 1.54        | 0.98 | 5.7        | 3.1       | 4.15        | 0.82 | 4.4      | 2.51        | 0.91 |
| 2014 | 8.1        | 7.3       | 1.76        | 0.98 | 7.6      | 1.34        | 0.99 | 6.0        | 6.3       | 2.11        | 0.96 | 6.0      | <b>1.63</b> | 0.97 | 4.6        | 3.2       | 3.30        | 0.82 | 4.0      | 1.89        | 0.92 |
| 2015 | 10.8       | 9.9       | 1.70        | 0.99 | 10.3     | 1.21        | 0.99 | 7.1        | 8.0       | 2.46        | 0.98 | 7.4      | 1.21        | 0.99 | 5.8        | 3.7       | 3.57        | 0.89 | 5.0      | 1.77        | 0.97 |
| 2016 | 10.1       | 9.0       | 1.84        | 0.99 | 9.6      | 1.03        | 1.00 | 7.3        | 7.7       | 2.14        | 0.98 | 7.4      | 0.91        | 0.99 | 4.8        | 2.9       | 3.41        | 0.84 | 4.1      | 1.58        | 0.96 |
| 2017 | 11.4       | 10.5      | 1.76        | 0.99 | 11.1     | 1.15        | 1.00 | 7.9        | 8.6       | <b>2.88</b> | 0.97 | 8.4      | 1.40        | 0.99 | 5.5        | 3.5       | 3.67        | 0.88 | 4.6      | 2.00        | 0.95 |
| 2018 | 10.9       | 9.3       | <b>2.64</b> | 0.99 | 9.9      | <b>1.81</b> | 0.99 | 7.4        | 8.1       | 2.65        | 0.97 | 7.6      | 1.20        | 0.99 | 5.5        | 3.1       | <b>4.72</b> | 0.79 | 4.3      | <b>2.66</b> | 0.94 |
| R2   | 91m_SOR_A  | ERA5-Land |             |      | Subotica |             |      | 91m_SOR_A  | ERA5-Land |             |      | Subotica |             |      | 91m_SOR_A  | ERA5-Land |             |      | Subotica |             |      |
| Year | SD         | SD        | RMSE        | CC   | SD       | RMSE        | CC   | SD         | SD        | RMSE        | CC   | SD       | RMSE        | CC   | SD         | SD        | RMSE        | CC   | SD       | RMSE        | CC   |
| 2013 | 10.7       | 9.4       | 1.85        | 0.99 | 10.2     | 1.37        | 0.99 | 6.8        | 7.5       | 2.84        | 0.97 | 7.4      | 2.3         | 0.97 | 5.6        | 3.2       | 4.10        | 0.86 | 4.3      | 3.00        | 0.92 |
| 2014 | 8.9        | 8.2       | 1.67        | 0.99 | 8.4      | 1.43        | 0.99 | 6.6        | 6.8       | 2.63        | 0.97 | 6.6      | 2.4         | 0.96 | 5.0        | 3.1       | 3.83        | 0.88 | 3.9      | 2.90        | 0.91 |
| 2015 | 10.7       | 9.5       | 1.97        | 0.99 | 10.1     | 1.46        | 0.99 | 7.1        | 8.0       | 2.91        | 0.97 | 7.7      | 2.4         | 0.98 | 6.0        | 3.5       | 4.35        | 0.88 | 4.5      | 3.37        | 0.93 |
| 2016 | 10.3       | 9.1       | <b>2.08</b> | 0.99 | 9.7      | 1.48        | 0.99 | 7.2        | 7.8       | 2.88        | 0.97 | 7.6      | 2.1         | 0.98 | 5.2        | 2.8       | 4.48        | 0.84 | 3.9      | 3.14        | 0.91 |
| 2017 | 10.9       | 9.8       | 1.98        | 0.99 | 10.4     | 1.31        | 0.99 | 7.5        | 8.2       | <b>3.12</b> | 0.97 | 8.0      | 2.3         | 0.98 | 5.4        | 3.1       | <b>4.61</b> | 0.86 | 4.3      | 2.99        | 0.93 |
| 2018 | 11.1       | 9.9       | 1.91        | 0.99 | 10.6     | 1.24        | 1.00 | 7.8        | 8.5       | 2.77        | 0.97 | 8.2      | 2.1         | 0.98 | 5.2        | 3.0       | 4.15        | 0.86 | 3.9      | 2.75        | 0.93 |
| R3   | 90m_CRC_PI | ERA5-Land |             |      | Vrsac    |             |      | 90m_CRC_PI | ERA5-Land |             |      | Vrsac    |             |      | 90m_CRC_PI | ERA5-Land |             |      | Vrsac    |             |      |
| Year | SD         | SD        | RMSE        | CC   | SD       | RMSE        | CC   | SD         | SD        | RMSE        | CC   | SD       | RMSE        | CC   | SD         | SD        | RMSE        | CC   | SD       | RMSE        | CC   |
| 2013 | 10.8       | 9.4       | <b>2.76</b> | 0.99 | 9.9      | <b>1.71</b> | 0.99 | 6.9        | 7.7       | <b>3.86</b> | 0.90 | 7.4      | <b>3.03</b> | 0.92 | 6.5        | 3.4       | <b>5.82</b> | 0.79 | 5.0      | <b>3.75</b> | 0.86 |
| 2014 | 9.0        | 8.2       | 2.57        | 0.98 | 8.3      | 1.55        | 0.99 | 6.7        | 7.0       | 2.21        | 0.97 | 6.9      | 2.45        | 0.95 | 5.1        | 3.3       | 4.25        | 0.89 | 4.6      | 2.82        | 0.90 |
| 2015 | 11.0       | 9.6       | 2.50        | 0.99 | 10.3     | 1.24        | 1.00 | 7.8        | 8.1       | 2.33        | 0.97 | 8.2      | 2.22        | 0.96 | 5.6        | 3.5       | 4.20        | 0.88 | 5.4      | 2.52        | 0.91 |
| 2016 | 10.3       | 9.0       | 2.76        | 0.99 | 9.6      | 1.44        | 0.99 | 7.1        | 7.6       | 3.27        | 0.95 | 8.0      | 2.47        | 0.96 | 5.5        | 3.2       | 5.52        | 0.79 | 4.6      | 3.18        | 0.85 |

| R4   | 71m_KIK_Pl   | ERA5-Land |             |      | Kikinda       |             |      | 71m_KIK_Pl   | ERA5-Land |             |      | Kikinda       |             |      | 71m_KIK_Pl   | ERA5-Land |             |      | Kikinda       |             |      |
|------|--------------|-----------|-------------|------|---------------|-------------|------|--------------|-----------|-------------|------|---------------|-------------|------|--------------|-----------|-------------|------|---------------|-------------|------|
| Year | SD           | SD        | RMSE        | CC   | SD            | RMSE        | CC   | SD           | SD        | RMSE        | CC   | SD            | RMSE        | CC   | SD           | SD        | RMSE        | CC   | SD            | RMSE        | CC   |
| 2013 | 9.9          | 8.8       | 2.11        | 0.99 | 9.4           | 1.34        | 0.99 | 6.1          | 7.0       | 2.62        | 0.97 | 6.6           | 1.27        | 0.99 | 5.3          | 3.1       | <b>4.29</b> | 0.89 | 4.3           | 2.14        | 0.97 |
| 2014 | 9.0          | 8.0       | 1.88        | 0.99 | 8.5           | 1.17        | 0.99 | 6.6          | 6.8       | 2.11        | 0.97 | 6.5           | <b>1.40</b> | 0.98 | 4.8          | 3.1       | 3.44        | 0.88 | 4.2           | 1.69        | 0.97 |
| 2015 | 10.7         | 9.8       | 2.12        | 0.98 | 10.4          | 1.45        | 0.99 | 7.3          | 8.2       | 2.39        | 0.98 | 7.7           | 1.21        | 0.99 | 5.8          | 3.5       | 3.78        | 0.89 | 5.0           | 1.92        | 0.96 |
| 2016 | 10.3         | 9.2       | 1.77        | 0.99 | 9.8           | 0.73        | 1.00 | 7.4          | 7.7       | 2.03        | 0.98 | 7.5           | 1.09        | 0.99 | 4.8          | 2.9       | 3.29        | 0.87 | 4.2           | 1.42        | 0.96 |
| 2017 | 11.4         | 10.2      | <b>2.53</b> | 0.98 | 11.0          | 1.95        | 0.99 | 8.2          | 8.5       | <b>2.66</b> | 0.98 | 8.3           | 1.28        | 0.99 | 5.5          | 3.2       | 4.17        | 0.80 | 4.5           | 2.50        | 0.90 |
| 2018 | 10.1         | 9.3       | 2.38        | 0.97 | 9.9           | <b>2.09</b> | 0.98 | 7.3          | 7.8       | 2.57        | 0.97 | 7.4           | 1.20        | 0.99 | 5.4          | 3.0       | 4.11        | 0.79 | 4.2           | <b>2.61</b> | 0.88 |
| R5   | 94m_SMK_G_Pr | ERA5-Land |             |      | Sr. Mitrovica |             |      | 94m_SMK_G_Pr | ERA5-Land |             |      | Sr. Mitrovica |             |      | 94m_SMK_G_Pr | ERA5-Land |             |      | Sr. Mitrovica |             |      |
| Year | SD           | SD        | RMSE        | CC   | SD            | RMSE        | CC   | SD           | SD        | RMSE        | CC   | SD            | RMSE        | CC   | SD           | SD        | RMSE        | CC   | SD            | RMSE        | CC   |
| 2014 | 8.0          | 7.2       | 1.83        | 0.98 | 7.7           | 1.21        | 0.99 | 5.9          | 6.3       | 1.68        | 0.96 | 6.2           | 1.61        | 0.97 | 4.2          | 3.1       | 2.65        | 0.80 | 4.4           | 2.27        | 0.90 |
| 2015 | 9.4          | 9.2       | <b>2.03</b> | 0.98 | 9.5           | <b>1.46</b> | 0.99 | 6.5          | 7.5       | <b>2.63</b> | 0.94 | 6.8           | <b>2.37</b> | 0.95 | 4.8          | 3.7       | 2.76        | 0.85 | 5.3           | <b>2.34</b> | 0.91 |
| 2016 | 9.9          | 9.1       | 1.86        | 0.99 | 9.6           | 0.93        | 1.00 | 7.2          | 7.8       | 1.92        | 0.97 | 7.4           | 1.43        | 0.98 | 4.5          | 3.0       | <b>3.10</b> | 0.79 | 4.6           | 1.92        | 0.93 |
| 2017 | 11.2         | 10.9      | 1.70        | 0.99 | 11.1          | 1.17        | 1.00 | 8.2          | 9.2       | 2.31        | 0.97 | 8.4           | 1.70        | 0.98 | 4.7          | 3.5       | 2.73        | 0.83 | 5.0           | 2.23        | 0.93 |
| 2018 | 10.7         | 9.9       | 1.84        | 0.99 | 10.6          | 0.95        | 1.00 | 7.5          | 8.4       | 2.09        | 0.97 | 7.7           | 1.42        | 0.99 | 4.8          | 3.2       | 3.23        | 0.80 | 4.8           | 1.76        | 0.95 |
